# Supplementary material for: Geographical origin traceability of rice using a FTIR-based metabolomics approach
Source: Royal Society of Chemistry journal article supplement (doi:10.1039/d2mo00317a), 2023-04-20
Supplement: d2mo00317a1.pdf [file d2mo00317a1.pdf]

Supplementary Information

**Geographical Origin Traceability of Rice Using FTIR-based  
Metabolomics Approach**

Weifeng Xue\*, Qi Wang, Xuemei Li, Mei Wang, Zhenlin Dong, Haitao Bian, Fang Li\*

*Technical Center of Dalian Customs, Dalian, 116000, China.*

\*Corresponding authors. E-mail: xwf526@163.com (Weifeng Xue);

fanglee\_4125@163.com (Fang Li).

18 Pages, 2 Table, 6 Figures

|                                                              |    |
|--------------------------------------------------------------|----|
| Table S1 Wave number markers screened in rice groups.....    | 2  |
| Table S2 Pairwise t-test results of wave number markers..... | 9  |
| Fig. S1 Infrared spectrum of mixed rice group.....           | 16 |
| Fig. S2 PCA score plot of 17 rice groups .....               | 16 |
| Fig. S3 Cluster analysis plot of 17 rice groups. ....        | 17 |
| Fig. S4 OPLS-DA score plot of No. 18 rice group. ....        | 17 |
| Fig. S5 S-plot plot of No. 18 rice group.....                | 18 |
| Fig. S6 Permutation test plot of No. 18 rice group. ....     | 18 |

**Table S1** Wave number markers screened in rice groups

| Rice No. | Var ID (Primary) | Markers  | VIP Pred | Var ID (Primary) | Markers  | VIP Pred | Var ID (Primary) | Markers  | VIP Pred |
|----------|------------------|----------|----------|------------------|----------|----------|------------------|----------|----------|
| 1        | Var 1071         | 2935.658 | 1.550    | Var 1072         | 2937.587 | 1.551    | Var 1073         | 2939.516 | 1.551    |
|          | Var 1074         | 2941.444 | 1.552    | Var 1075         | 2943.373 | 1.552    | Var 1076         | 2945.302 | 1.552    |
|          | Var 1077         | 2947.231 | 1.552    | Var 1078         | 2949.160 | 1.552    | Var 1079         | 2951.088 | 1.553    |
|          | Var 1080         | 2953.017 | 1.553    | Var 1081         | 2954.946 | 1.554    | Var 1082         | 2956.875 | 1.555    |
|          | Var 1083         | 2958.804 | 1.556    | Var 1084         | 2960.733 | 1.557    | Var 1085         | 2962.661 | 1.557    |
|          | Var 1086         | 2964.59  | 1.557    | Var 1087         | 2966.519 | 1.558    | Var 1088         | 2968.448 | 1.558    |
|          | Var 1089         | 2970.377 | 1.558    | Var 1090         | 2972.305 | 1.559    | Var 1091         | 2974.234 | 1.560    |
|          | Var 1092         | 2976.163 | 1.560    | Var 1093         | 2978.092 | 1.561    | Var 1094         | 2980.021 | 1.561    |
|          | Var 1095         | 2981.950 | 1.561    | Var 1096         | 2983.878 | 1.561    | Var 1097         | 2985.807 | 1.562    |
|          | Var 1098         | 2987.736 | 1.562    | Var 1099         | 2989.665 | 1.563    | Var 1100         | 2991.594 | 1.563    |
|          | Var 1101         | 2993.522 | 1.564    | Var 1102         | 2995.451 | 1.565    | Var 1103         | 2997.380 | 1.565    |
|          | Var 1104         | 2999.309 | 1.565    | Var 1105         | 3001.238 | 1.565    | Var 1106         | 3003.167 | 1.565    |
|          | Var 1107         | 3005.095 | 1.566    | Var 1108         | 3007.024 | 1.566    | Var 1109         | 3008.953 | 1.566    |
|          | Var 1110         | 3010.882 | 1.567    | Var 1111         | 3012.811 | 1.568    | Var 1112         | 3014.739 | 1.567    |
|          | Var 1113         | 3016.668 | 1.566    | Var 1114         | 3018.597 | 1.566    | Var 1115         | 3020.526 | 1.566    |
|          | Var 1116         | 3022.455 | 1.566    | Var 1117         | 3024.383 | 1.566    | Var 1118         | 3026.312 | 1.566    |
|          | Var 1119         | 3028.241 | 1.566    | Var 1120         | 3030.170 | 1.567    | Var 1121         | 3032.099 | 1.568    |
|          | Var 1122         | 3034.028 | 1.567    | Var 1123         | 3035.956 | 1.567    | Var 1124         | 3037.885 | 1.566    |
|          | Var 1125         | 3039.814 | 1.566    | Var 1126         | 3041.743 | 1.565    | Var 1127         | 3043.672 | 1.565    |
|          | Var 1128         | 3045.600 | 1.565    | Var 1129         | 3047.529 | 1.566    | Var 1130         | 3049.458 | 1.567    |
|          | Var 1131         | 3051.387 | 1.566    | Var 1132         | 3053.316 | 1.566    | Var 1133         | 3055.245 | 1.567    |
|          | Var 1134         | 3057.173 | 1.567    | Var 1135         | 3059.102 | 1.566    | Var 1136         | 3061.031 | 1.566    |
|          | Var 1137         | 3062.960 | 1.566    | Var 1138         | 3064.889 | 1.568    | Var 1139         | 3066.817 | 1.568    |
|          | Var 1140         | 3068.746 | 1.568    | Var 1141         | 3070.675 | 1.567    | Var 1142         | 3072.604 | 1.567    |
|          | Var 1143         | 3074.533 | 1.567    | Var 1144         | 3076.462 | 1.567    | Var 1145         | 3078.390 | 1.567    |
|          | Var 1146         | 3080.319 | 1.568    | Var 1147         | 3082.248 | 1.568    | Var 1148         | 3084.177 | 1.568    |
|          | Var 1149         | 3086.106 | 1.568    | Var 1150         | 3088.034 | 1.568    | Var 1151         | 3089.963 | 1.568    |
|          | Var 1152         | 3091.892 | 1.568    | Var 1153         | 3093.821 | 1.568    | Var 1154         | 3095.750 | 1.569    |
|          | Var 1155         | 3097.678 | 1.569    | Var 1156         | 3099.607 | 1.569    | Var 1157         | 3101.536 | 1.570    |
|          | Var 1158         | 3103.465 | 1.570    | Var 1159         | 3105.394 | 1.569    | Var 1160         | 3107.323 | 1.569    |
|          | Var 1161         | 3109.251 | 1.569    | Var 1162         | 3111.180 | 1.569    | Var 1163         | 3113.109 | 1.569    |
|          | Var 1164         | 3115.038 | 1.569    | Var 1165         | 3116.967 | 1.569    | Var 1166         | 3118.895 | 1.569    |
|          | Var 1167         | 3120.824 | 1.569    | Var 1168         | 3122.753 | 1.569    | Var 1169         | 3124.682 | 1.569    |
|          | Var 1170         | 3126.611 | 1.569    | Var 1171         | 3128.540 | 1.568    | Var 1172         | 3130.468 | 1.567    |
|          | Var 1173         | 3132.397 | 1.567    | Var 1174         | 3134.326 | 1.567    | Var 1175         | 3136.255 | 1.566    |
|          | Var 1176         | 3138.184 | 1.566    | Var 1177         | 3140.112 | 1.566    | Var 1178         | 3142.041 | 1.566    |
|          | Var 1179         | 3143.970 | 1.566    | Var 1180         | 3145.899 | 1.565    | Var 1181         | 3147.828 | 1.565    |
|          | Var 1182         | 3149.757 | 1.564    | Var 1183         | 3151.685 | 1.564    | Var 1184         | 3153.614 | 1.563    |
|          | Var 1185         | 3155.543 | 1.563    | Var 1186         | 3157.472 | 1.563    | Var 1187         | 3159.401 | 1.563    |
|          | Var 1188         | 3161.329 | 1.563    | Var 1189         | 3163.258 | 1.562    | Var 1190         | 3165.187 | 1.562    |
|          | Var 1191         | 3167.116 | 1.562    | Var 1192         | 3169.045 | 1.561    | Var 1193         | 3170.974 | 1.561    |
|          | Var 1194         | 3172.902 | 1.560    | Var 1195         | 3174.831 | 1.560    | Var 1196         | 3176.760 | 1.560    |
|          | Var 1197         | 3178.689 | 1.561    | Var 1198         | 3180.618 | 1.560    | Var 1199         | 3182.546 | 1.559    |
|          | Var 1200         | 3184.475 | 1.559    | Var 1201         | 3186.404 | 1.558    | Var 1202         | 3188.333 | 1.557    |
|          | Var 1203         | 3190.262 | 1.557    | Var 1204         | 3192.190 | 1.557    | Var 1205         | 3194.119 | 1.556    |
|          | Var 1206         | 3196.048 | 1.557    | Var 1207         | 3197.977 | 1.558    | Var 1208         | 3199.906 | 1.557    |
|          | Var 1209         | 3201.835 | 1.556    | Var 1210         | 3203.763 | 1.555    | Var 1211         | 3205.692 | 1.554    |
| Var 1212 | 3207.621         | 1.554    | Var 1213 | 3209.55          | 1.554    | Var 1214 | 3211.479         | 1.554    |          |
| Var 1215 | 3213.407         | 1.554    | Var 1216 | 3215.336         | 1.554    | Var 1217 | 3217.265         | 1.553    |          |
| Var 1218 | 3219.194         | 1.554    | Var 1219 | 3221.123         | 1.553    | Var 1220 | 3223.052         | 1.552    |          |
| Var 1221 | 3224.980         | 1.551    | Var 1222 | 3226.909         | 1.552    | Var 1223 | 3228.838         | 1.552    |          |
| Var 1224 | 3230.767         | 1.552    | Var 1225 | 3232.696         | 1.551    | Var 1226 | 3234.624         | 1.551    |          |
| Var 1227 | 3236.553         | 1.551    | Var 1228 | 3238.482         | 1.550    |          |                  |          |          |
| Var 1546 | 3851.846         | 1.553    | Var 1547 | 3853.774         | 1.591    | Var 1548 | 3855.703         | 1.566    |          |
| Var 1549 | 3857.632         | 1.549    | Var 1550 | 3859.561         | 1.535    | Var 1551 | 3861.490         | 1.540    |          |
| Var 1552 | 3863.418         | 1.555    | Var 1553 | 3865.347         | 1.552    | Var 1554 | 3867.276         | 1.538    |          |
| Var 1555 | 3869.205         | 1.560    | Var 1556 | 3871.134         | 1.562    | Var 1557 | 3873.063         | 1.561    |          |
| Var 1558 | 3874.991         | 1.555    | Var 1559 | 3876.920         | 1.533    | Var 1560 | 3878.849         | 1.543    |          |
| Var 1561 | 3880.778         | 1.560    | Var 1562 | 3882.707         | 1.550    | Var 1563 | 3884.635         | 1.559    |          |
| Var 1564 | 3886.564         | 1.556    | Var 1565 | 3888.493         | 1.538    | Var 1566 | 3890.422         | 1.553    |          |
| Var 1567 | 3892.351         | 1.561    | Var 1568 | 3894.280         | 1.544    | Var 1569 | 3896.208         | 1.532    |          |
| Var 1570 | 3898.137         | 1.541    | Var 1571 | 3900.066         | 1.556    | Var 1572 | 3901.995         | 1.565    |          |
| Var 1573 | 3903.924         | 1.576    | Var 1574 | 3905.852         | 1.566    | Var 1575 | 3907.781         | 1.550    |          |
| Var 1576 | 3909.710         | 1.543    | Var 1577 | 3911.639         | 1.540    | Var 1578 | 3913.568         | 1.537    |          |
| Var 1579 | 3915.496         | 1.547    | Var 1580 | 3917.425         | 1.557    | Var 1581 | 3919.354         | 1.554    |          |
| Var 1582 | 3921.283         | 1.548    | Var 1583 | 3923.212         | 1.552    | Var 1584 | 3925.141         | 1.556    |          |
| Var 1585 | 3927.069         | 1.545    | Var 1586 | 3928.998         | 1.546    | Var 1587 | 3930.927         | 1.557    |          |
| Var 1588 | 3932.856         | 1.560    | Var 1589 | 3934.785         | 1.550    | Var 1590 | 3936.713         | 1.544    |          |
| Var 1591 | 3938.642         | 1.542    | Var 1592 | 3940.571         | 1.546    | Var 1593 | 3942.500         | 1.556    |          |
| Var 1594 | 3944.429         | 1.551    | Var 1595 | 3946.358         | 1.549    | Var 1596 | 3948.286         | 1.556    |          |
| Var 1597 | 3950.215         | 1.555    | Var 1598 | 3952.144         | 1.550    | Var 1599 | 3954.073         | 1.547    |          |
| Var 1600 | 3956.002         | 1.547    | Var 1601 | 3957.930         | 1.547    | Var 1602 | 3959.859         | 1.548    |          |
| Var 1603 | 3961.788         | 1.551    | Var 1604 | 3963.717         | 1.549    | Var 1605 | 3965.646         | 1.547    |          |
| Var 1606 | 3967.575         | 1.547    | Var 1607 | 3969.503         | 1.548    | Var 1608 | 3971.432         | 1.548    |          |
| Var 1609 | 3973.361         | 1.549    | Var 1610 | 3975.290         | 1.550    | Var 1611 | 3977.219         | 1.548    |          |
| Var 1612 | 3979.147         | 1.547    | Var 1613 | 3981.076         | 1.548    | Var 1614 | 3983.005         | 1.548    |          |
| Var 1615 | 3984.934         | 1.547    | Var 1616 | 3986.863         | 1.547    | Var 1617 | 3988.791         | 1.548    |          |
| Var 1618 | 3990.720         | 1.549    | Var 1619 | 3992.649         | 1.549    | Var 1620 | 3994.578         | 1.549    |          |
| Var 1621 | 3996.507         | 1.548    | Var 1622 | 3998.436         | 1.548    | Var 1623 | 4000.364         | 1.548    |          |
| Var 1275 | 3329.136         | 1.701    | Var 1276 | 3331.065         | 1.701    | Var 1277 | 3332.994         | 1.700    |          |
| Var 1278 | 3334.923         | 1.702    | Var 1279 | 3336.852         | 1.703    | Var 1280 | 3338.780         | 1.703    |          |
| Var 1281 | 3340.709         | 1.703    | Var 1282 | 3342.638         | 1.703    | Var 1283 | 3344.567         | 1.704    |          |
| Var 1284 | 3346.496         | 1.705    | Var 1285 | 3348.425         | 1.706    | Var 1286 | 3350.353         | 1.706    |          |

**Table S1** Wave number markers screened in rice groups

|   |          |          |       |          |          |       |          |          |       |
|---|----------|----------|-------|----------|----------|-------|----------|----------|-------|
|   | Var 1287 | 3352.282 | 1.706 | Var 1288 | 3354.211 | 1.707 | Var 1289 | 3356.140 | 1.709 |
|   | Var 1290 | 3358.069 | 1.708 | Var 1291 | 3359.997 | 1.708 | Var 1292 | 3361.926 | 1.709 |
|   | Var 1293 | 3363.855 | 1.710 | Var 1294 | 3365.784 | 1.712 | Var 1295 | 3367.713 | 1.713 |
|   | Var 1296 | 3369.642 | 1.714 | Var 1297 | 3371.570 | 1.714 | Var 1298 | 3373.499 | 1.715 |
|   | Var 1299 | 3375.428 | 1.716 | Var 1300 | 3377.357 | 1.715 | Var 1301 | 3379.286 | 1.715 |
|   | Var 1302 | 3381.214 | 1.715 | Var 1303 | 3383.143 | 1.716 | Var 1304 | 3385.072 | 1.720 |
|   | Var 1305 | 3387.001 | 1.720 | Var 1306 | 3388.930 | 1.718 | Var 1307 | 3390.859 | 1.717 |
|   | Var 1308 | 3392.787 | 1.721 | Var 1309 | 3394.716 | 1.720 | Var 1310 | 3396.645 | 1.721 |
|   | Var 1311 | 3398.574 | 1.722 | Var 1312 | 3400.503 | 1.721 | Var 1313 | 3402.431 | 1.723 |
|   | Var 1314 | 3404.360 | 1.725 | Var 1315 | 3406.289 | 1.726 | Var 1316 | 3408.218 | 1.726 |
|   | Var 1317 | 3410.147 | 1.726 | Var 1318 | 3412.076 | 1.726 | Var 1319 | 3414.004 | 1.726 |
|   | Var 1320 | 3415.933 | 1.724 | Var 1321 | 3417.862 | 1.721 | Var 1322 | 3419.791 | 1.725 |
|   | Var 1323 | 3421.720 | 1.729 | Var 1324 | 3423.648 | 1.728 | Var 1325 | 3425.577 | 1.727 |
|   | Var 1326 | 3427.506 | 1.726 | Var 1327 | 3429.435 | 1.725 | Var 1328 | 3431.364 | 1.726 |
|   | Var 1329 | 3433.292 | 1.725 | Var 1330 | 3435.221 | 1.723 | Var 1331 | 3437.150 | 1.723 |
|   | Var 1332 | 3439.079 | 1.721 | Var 1333 | 3441.008 | 1.721 | Var 1334 | 3442.937 | 1.721 |
|   | Var 1335 | 3444.865 | 1.718 | Var 1336 | 3446.794 | 1.728 | Var 1337 | 3448.723 | 1.731 |
|   | Var 1338 | 3450.652 | 1.726 | Var 1339 | 3452.581 | 1.724 | Var 1340 | 3454.509 | 1.724 |
|   | Var 1341 | 3456.438 | 1.724 | Var 1342 | 3458.367 | 1.722 | Var 1343 | 3460.296 | 1.723 |
|   | Var 1344 | 3462.225 | 1.726 | Var 1345 | 3464.154 | 1.725 | Var 1346 | 3466.082 | 1.724 |
|   | Var 1347 | 3468.011 | 1.724 | Var 1348 | 3469.940 | 1.723 | Var 1349 | 3471.869 | 1.722 |
|   | Var 1350 | 3473.798 | 1.723 | Var 1351 | 3475.726 | 1.724 | Var 1352 | 3477.655 | 1.718 |
|   | Var 1353 | 3479.584 | 1.716 | Var 1354 | 3481.513 | 1.724 | Var 1355 | 3483.442 | 1.725 |
|   | Var 1356 | 3485.371 | 1.720 | Var 1357 | 3487.299 | 1.722 | Var 1358 | 3489.228 | 1.723 |
|   | Var 1359 | 3491.157 | 1.719 | Var 1360 | 3493.086 | 1.715 | Var 1361 | 3495.015 | 1.717 |
|   | Var 1362 | 3496.943 | 1.717 | Var 1363 | 3498.872 | 1.708 | Var 1364 | 3500.801 | 1.705 |
|   | Var 1365 | 3502.730 | 1.717 | Var 1366 | 3504.659 | 1.719 | Var 1367 | 3506.587 | 1.708 |
|   | Var 1368 | 3508.516 | 1.711 | Var 1369 | 3510.445 | 1.719 | Var 1370 | 3512.374 | 1.716 |
|   | Var 1371 | 3514.303 | 1.712 | Var 1372 | 3516.232 | 1.709 | Var 1373 | 3518.160 | 1.707 |
| 4 | Var 100  | 1062.778 | 1.913 | Var 101  | 1064.706 | 1.924 | Var 102  | 1066.635 | 1.937 |
|   | Var 103  | 1068.564 | 1.942 | Var 104  | 1070.493 | 1.941 | Var 105  | 1072.422 | 1.939 |
|   | Var 106  | 1074.351 | 1.935 | Var 107  | 1076.279 | 1.923 | Var 108  | 1078.208 | 1.920 |
|   | Var 109  | 1080.137 | 1.922 | Var 110  | 1082.066 | 1.916 | Var 111  | 1083.995 | 1.908 |
|   | Var 112  | 1085.923 | 1.914 | Var 113  | 1087.852 | 1.920 | Var 114  | 1089.781 | 1.923 |
|   | Var 115  | 1091.710 | 1.929 | Var 116  | 1093.639 | 1.945 | Var 117  | 1095.567 | 1.957 |
|   | Var 118  | 1097.496 | 1.964 | Var 119  | 1099.425 | 1.974 | Var 120  | 1101.354 | 1.985 |
|   | Var 121  | 1103.283 | 1.986 | Var 122  | 1105.212 | 1.987 | Var 123  | 1107.140 | 1.991 |
|   | Var 124  | 1109.069 | 1.993 | Var 125  | 1110.998 | 1.989 | Var 126  | 1112.927 | 1.987 |
|   | Var 127  | 1114.856 | 1.983 | Var 128  | 1116.784 | 1.977 | Var 129  | 1118.713 | 1.966 |
|   | Var 130  | 1120.642 | 1.955 | Var 131  | 1122.571 | 1.947 | Var 132  | 1124.500 | 1.940 |
|   | Var 133  | 1126.429 | 1.927 | Var 134  | 1128.357 | 1.916 | Var 135  | 1130.286 | 1.912 |
|   | Var 136  | 1132.215 | 1.907 | Var 137  | 1134.144 | 1.889 | Var 138  | 1136.073 | 1.876 |
|   | Var 139  | 1138.001 | 1.872 | Var 140  | 1139.930 | 1.864 | Var 141  | 1141.859 | 1.851 |
|   | Var 142  | 1143.788 | 1.846 | Var 143  | 1145.717 | 1.842 | Var 144  | 1147.646 | 1.837 |
|   | Var 145  | 1149.574 | 1.834 | Var 146  | 1151.503 | 1.837 | Var 147  | 1153.432 | 1.832 |
|   | Var 148  | 1155.361 | 1.823 | Var 149  | 1157.290 | 1.813 | Var 150  | 1159.218 | 1.803 |
|   | Var 151  | 1161.147 | 1.784 | Var 152  | 1163.076 | 1.768 | Var 153  | 1165.005 | 1.757 |
|   | Var 154  | 1166.934 | 1.750 | Var 155  | 1168.862 | 1.737 | Var 156  | 1170.791 | 1.730 |
|   | Var 157  | 1172.720 | 1.726 | Var 158  | 1174.649 | 1.729 | Var 159  | 1176.578 | 1.722 |
|   | Var 160  | 1178.507 | 1.721 | Var 161  | 1180.435 | 1.727 | Var 162  | 1182.364 | 1.728 |
|   | Var 163  | 1184.293 | 1.713 | Var 164  | 1186.222 | 1.706 | Var 165  | 1188.151 | 1.708 |
|   | Var 166  | 1190.079 | 1.706 | Var 167  | 1192.008 | 1.693 | Var 168  | 1193.937 | 1.686 |
|   | Var 169  | 1195.866 | 1.684 | Var 170  | 1197.795 | 1.682 | Var 171  | 1199.724 | 1.674 |
|   | Var 172  | 1201.652 | 1.675 | Var 173  | 1203.581 | 1.677 | Var 174  | 1205.510 | 1.674 |
|   | Var 175  | 1207.439 | 1.665 | Var 176  | 1209.368 | 1.660 | Var 177  | 1211.296 | 1.653 |
|   | Var 178  | 1213.225 | 1.648 |          |          |       |          |          |       |
|   | Var 151  | 1161.147 | 1.505 | Var 152  | 1163.076 | 1.532 | Var 153  | 1165.005 | 1.561 |
|   | Var 154  | 1166.934 | 1.587 | Var 155  | 1168.862 | 1.614 | Var 156  | 1170.791 | 1.638 |
|   | Var 157  | 1172.720 | 1.663 | Var 158  | 1174.649 | 1.677 | Var 159  | 1176.578 | 1.690 |
|   | Var 160  | 1178.507 | 1.704 | Var 161  | 1180.435 | 1.714 | Var 162  | 1182.364 | 1.717 |
|   | Var 163  | 1184.293 | 1.724 | Var 164  | 1186.222 | 1.732 | Var 165  | 1188.151 | 1.732 |
|   | Var 166  | 1190.079 | 1.728 | Var 167  | 1192.008 | 1.731 | Var 168  | 1193.937 | 1.734 |
|   | Var 169  | 1195.866 | 1.731 | Var 170  | 1197.795 | 1.725 | Var 171  | 1199.724 | 1.726 |
|   | Var 172  | 1201.652 | 1.724 | Var 173  | 1203.581 | 1.718 | Var 174  | 1205.510 | 1.714 |
|   | Var 175  | 1207.439 | 1.716 | Var 176  | 1209.368 | 1.717 | Var 177  | 1211.296 | 1.715 |
|   | Var 178  | 1213.225 | 1.711 | Var 179  | 1215.154 | 1.716 | Var 180  | 1217.083 | 1.717 |
|   | Var 181  | 1219.012 | 1.714 | Var 182  | 1220.941 | 1.710 | Var 183  | 1222.869 | 1.712 |
|   | Var 184  | 1224.798 | 1.709 | Var 185  | 1226.727 | 1.703 | Var 186  | 1228.656 | 1.701 |
|   | Var 187  | 1230.585 | 1.703 | Var 188  | 1232.513 | 1.699 | Var 189  | 1234.442 | 1.693 |
|   | Var 190  | 1236.371 | 1.690 | Var 191  | 1238.300 | 1.693 | Var 192  | 1240.229 | 1.689 |
| 5 | Var 193  | 1242.158 | 1.689 | Var 194  | 1244.086 | 1.689 | Var 195  | 1246.015 | 1.690 |
|   | Var 196  | 1247.944 | 1.687 | Var 197  | 1249.873 | 1.686 | Var 198  | 1251.802 | 1.687 |
|   | Var 199  | 1253.730 | 1.687 | Var 200  | 1255.659 | 1.683 | Var 201  | 1257.588 | 1.687 |
|   | Var 202  | 1259.517 | 1.682 | Var 203  | 1261.446 | 1.672 | Var 204  | 1263.374 | 1.675 |
|   | Var 205  | 1265.303 | 1.678 | Var 206  | 1267.232 | 1.678 | Var 207  | 1269.161 | 1.682 |
|   | Var 208  | 1271.090 | 1.673 | Var 209  | 1273.019 | 1.662 | Var 210  | 1274.947 | 1.664 |
|   | Var 211  | 1276.876 | 1.667 | Var 212  | 1278.805 | 1.661 | Var 213  | 1280.734 | 1.656 |
|   | Var 214  | 1282.663 | 1.656 | Var 215  | 1284.591 | 1.661 | Var 216  | 1286.520 | 1.660 |
|   | Var 217  | 1288.449 | 1.649 | Var 218  | 1290.378 | 1.648 | Var 219  | 1292.307 | 1.650 |
|   | Var 220  | 1294.236 | 1.651 | Var 221  | 1296.164 | 1.650 | Var 222  | 1298.093 | 1.646 |
|   | Var 223  | 1300.022 | 1.645 | Var 224  | 1301.951 | 1.643 | Var 225  | 1303.880 | 1.645 |
|   | Var 226  | 1305.808 | 1.647 | Var 227  | 1307.737 | 1.643 | Var 228  | 1309.666 | 1.648 |
|   | Var 229  | 1311.595 | 1.662 | Var 230  | 1313.524 | 1.645 | Var 231  | 1315.453 | 1.658 |
|   | Var 232  | 1317.381 | 1.663 | Var 233  | 1319.310 | 1.627 | Var 234  | 1321.239 | 1.621 |
|   | Var 235  | 1323.168 | 1.634 | Var 236  | 1325.097 | 1.629 | Var 237  | 1327.025 | 1.629 |
|   | Var 238  | 1328.954 | 1.625 | Var 239  | 1330.883 | 1.618 | Var 240  | 1332.812 | 1.618 |

**Table S1** Wave number markers screened in rice groups

|   |          |          |       |          |          |       |          |          |       |
|---|----------|----------|-------|----------|----------|-------|----------|----------|-------|
|   | Var 241  | 1334.741 | 1.657 | Var 242  | 1336.669 | 1.709 | Var 243  | 1338.598 | 1.683 |
|   | Var 244  | 1340.527 | 1.584 | Var 245  | 1342.456 | 1.620 | Var 246  | 1344.385 | 1.655 |
|   | Var 247  | 1346.314 | 1.663 | Var 248  | 1348.242 | 1.658 | Var 249  | 1350.171 | 1.642 |
|   | Var 250  | 1352.100 | 1.653 | Var 251  | 1354.029 | 1.651 | Var 252  | 1355.958 | 1.629 |
|   | Var 253  | 1357.886 | 1.656 | Var 254  | 1359.815 | 1.737 | Var 255  | 1361.744 | 1.716 |
|   | Var 256  | 1363.673 | 1.562 | Var 257  | 1365.602 | 1.612 | Var 258  | 1367.531 | 1.643 |
|   | Var 259  | 1369.459 | 1.609 | Var 260  | 1371.388 | 1.689 | Var 261  | 1373.317 | 1.701 |
|   | Var 262  | 1375.246 | 1.551 | Var 263  | 1377.175 | 1.579 | Var 264  | 1379.103 | 1.577 |
|   | Var 265  | 1381.032 | 1.577 | Var 266  | 1382.961 | 1.578 | Var 267  | 1384.890 | 1.642 |
|   | Var 268  | 1386.819 | 1.570 |          |          |       |          |          |       |
|   | Var 1285 | 3348.425 | 1.501 | Var 1286 | 3350.353 | 1.504 | Var 1287 | 3352.282 | 1.507 |
|   | Var 1288 | 3354.211 | 1.512 | Var 1289 | 3356.140 | 1.518 | Var 1290 | 3358.069 | 1.520 |
|   | Var 1291 | 3359.997 | 1.523 | Var 1292 | 3361.926 | 1.527 | Var 1293 | 3363.855 | 1.529 |
|   | Var 1294 | 3365.784 | 1.533 | Var 1295 | 3367.713 | 1.535 | Var 1296 | 3369.642 | 1.537 |
|   | Var 1297 | 3371.570 | 1.539 | Var 1298 | 3373.499 | 1.542 | Var 1299 | 3375.428 | 1.545 |
|   | Var 1300 | 3377.357 | 1.548 | Var 1301 | 3379.286 | 1.551 | Var 1302 | 3381.214 | 1.553 |
|   | Var 1303 | 3383.143 | 1.558 | Var 1304 | 3385.072 | 1.562 | Var 1305 | 3387.001 | 1.561 |
|   | Var 1306 | 3388.930 | 1.560 | Var 1307 | 3390.859 | 1.564 | Var 1308 | 3392.787 | 1.571 |
|   | Var 1309 | 3394.716 | 1.572 | Var 1310 | 3396.645 | 1.576 | Var 1311 | 3398.574 | 1.577 |
|   | Var 1312 | 3400.503 | 1.577 | Var 1313 | 3402.431 | 1.580 | Var 1314 | 3404.360 | 1.582 |
|   | Var 1315 | 3406.289 | 1.582 | Var 1316 | 3408.218 | 1.583 | Var 1317 | 3410.147 | 1.584 |
|   | Var 1318 | 3412.076 | 1.588 | Var 1319 | 3414.004 | 1.590 | Var 1320 | 3415.933 | 1.590 |
|   | Var 1321 | 3417.862 | 1.592 | Var 1322 | 3419.791 | 1.601 | Var 1323 | 3421.720 | 1.605 |
|   | Var 1324 | 3423.648 | 1.599 | Var 1325 | 3425.577 | 1.595 | Var 1326 | 3427.506 | 1.595 |
|   | Var 1327 | 3429.435 | 1.596 | Var 1328 | 3431.364 | 1.598 | Var 1329 | 3433.292 | 1.598 |
|   | Var 1330 | 3435.221 | 1.597 | Var 1331 | 3437.150 | 1.598 | Var 1332 | 3439.079 | 1.598 |
|   | Var 1333 | 3441.008 | 1.601 | Var 1334 | 3442.937 | 1.602 | Var 1335 | 3444.865 | 1.603 |
|   | Var 1336 | 3446.794 | 1.617 | Var 1337 | 3448.723 | 1.613 | Var 1338 | 3450.652 | 1.603 |
| 6 | Var 1339 | 3452.581 | 1.602 | Var 1340 | 3454.509 | 1.603 | Var 1341 | 3456.438 | 1.603 |
|   | Var 1342 | 3458.367 | 1.601 | Var 1343 | 3460.296 | 1.602 | Var 1344 | 3462.225 | 1.606 |
|   | Var 1345 | 3464.154 | 1.602 | Var 1346 | 3466.082 | 1.601 | Var 1347 | 3468.011 | 1.600 |
|   | Var 1348 | 3469.940 | 1.599 | Var 1349 | 3471.869 | 1.599 | Var 1350 | 3473.798 | 1.601 |
|   | Var 1351 | 3475.726 | 1.600 | Var 1352 | 3477.655 | 1.592 | Var 1353 | 3479.584 | 1.596 |
|   | Var 1354 | 3481.513 | 1.607 | Var 1355 | 3483.442 | 1.602 | Var 1356 | 3485.371 | 1.595 |
|   | Var 1357 | 3487.299 | 1.599 | Var 1358 | 3489.228 | 1.598 | Var 1359 | 3491.157 | 1.590 |
|   | Var 1360 | 3493.086 | 1.587 | Var 1361 | 3495.015 | 1.591 | Var 1362 | 3496.943 | 1.590 |
|   | Var 1363 | 3498.872 | 1.579 | Var 1364 | 3500.801 | 1.585 | Var 1365 | 3502.730 | 1.604 |
|   | Var 1366 | 3504.659 | 1.597 | Var 1367 | 3506.587 | 1.580 | Var 1368 | 3508.516 | 1.589 |
|   | Var 1369 | 3510.445 | 1.593 | Var 1370 | 3512.374 | 1.580 | Var 1371 | 3514.303 | 1.572 |
|   | Var 1372 | 3516.232 | 1.568 | Var 1373 | 3518.160 | 1.565 | Var 1374 | 3520.089 | 1.559 |
|   | Var 1375 | 3522.018 | 1.569 | Var 1376 | 3523.947 | 1.581 | Var 1377 | 3525.876 | 1.578 |
|   | Var 1378 | 3527.804 | 1.585 | Var 1379 | 3529.733 | 1.578 | Var 1380 | 3531.662 | 1.561 |
|   | Var 1381 | 3533.591 | 1.550 | Var 1382 | 3535.520 | 1.560 | Var 1383 | 3537.449 | 1.558 |
|   | Var 1384 | 3539.377 | 1.540 | Var 1385 | 3541.306 | 1.528 | Var 1386 | 3543.235 | 1.541 |
|   | Var 1387 | 3545.164 | 1.575 | Var 1388 | 3547.093 | 1.576 | Var 1389 | 3549.021 | 1.543 |
|   | Var 1390 | 3550.950 | 1.544 | Var 1391 | 3552.879 | 1.557 | Var 1392 | 3554.808 | 1.537 |
|   | Var 1393 | 3556.737 | 1.520 | Var 1394 | 3558.666 | 1.519 | Var 1395 | 3560.594 | 1.516 |
|   | Var 1164 | 3115.038 | 1.502 | Var 1165 | 3116.967 | 1.506 | Var 1166 | 3118.895 | 1.509 |
|   | Var 1167 | 3120.824 | 1.512 | Var 1168 | 3122.753 | 1.516 | Var 1169 | 3124.682 | 1.519 |
|   | Var 1170 | 3126.611 | 1.521 | Var 1171 | 3128.540 | 1.523 | Var 1172 | 3130.468 | 1.523 |
|   | Var 1173 | 3132.397 | 1.526 | Var 1174 | 3134.326 | 1.530 | Var 1175 | 3136.255 | 1.532 |
|   | Var 1176 | 3138.184 | 1.534 | Var 1177 | 3140.112 | 1.536 | Var 1178 | 3142.041 | 1.538 |
|   | Var 1179 | 3143.970 | 1.541 | Var 1180 | 3145.899 | 1.542 | Var 1181 | 3147.828 | 1.544 |
|   | Var 1182 | 3149.757 | 1.545 | Var 1183 | 3151.685 | 1.547 | Var 1184 | 3153.614 | 1.550 |
|   | Var 1185 | 3155.543 | 1.552 | Var 1186 | 3157.472 | 1.555 | Var 1187 | 3159.401 | 1.557 |
|   | Var 1188 | 3161.329 | 1.559 | Var 1189 | 3163.258 | 1.560 | Var 1190 | 3165.187 | 1.562 |
|   | Var 1191 | 3167.116 | 1.563 | Var 1192 | 3169.045 | 1.565 | Var 1193 | 3170.974 | 1.567 |
|   | Var 1194 | 3172.902 | 1.569 | Var 1195 | 3174.831 | 1.570 | Var 1196 | 3176.760 | 1.572 |
|   | Var 1197 | 3178.689 | 1.576 | Var 1198 | 3180.618 | 1.577 | Var 1199 | 3182.546 | 1.577 |
|   | Var 1200 | 3184.475 | 1.580 | Var 1201 | 3186.404 | 1.582 | Var 1202 | 3188.333 | 1.582 |
|   | Var 1203 | 3190.262 | 1.583 | Var 1204 | 3192.190 | 1.585 | Var 1205 | 3194.119 | 1.587 |
|   | Var 1206 | 3196.048 | 1.589 | Var 1207 | 3197.977 | 1.592 | Var 1208 | 3199.906 | 1.593 |
|   | Var 1209 | 3201.835 | 1.593 | Var 1210 | 3203.763 | 1.594 | Var 1211 | 3205.692 | 1.595 |
|   | Var 1212 | 3207.621 | 1.596 | Var 1213 | 3209.550 | 1.598 | Var 1214 | 3211.479 | 1.599 |
|   | Var 1215 | 3213.407 | 1.601 | Var 1216 | 3215.336 | 1.603 | Var 1217 | 3217.265 | 1.603 |
|   | Var 1218 | 3219.194 | 1.604 | Var 1219 | 3221.123 | 1.606 | Var 1220 | 3223.052 | 1.606 |
| 7 | Var 1221 | 3224.980 | 1.606 | Var 1222 | 3226.909 | 1.607 | Var 1223 | 3228.838 | 1.609 |
|   | Var 1224 | 3230.767 | 1.610 | Var 1225 | 3232.696 | 1.611 | Var 1226 | 3234.624 | 1.611 |
|   | Var 1227 | 3236.553 | 1.612 | Var 1228 | 3238.482 | 1.613 | Var 1229 | 3240.411 | 1.614 |
|   | Var 1230 | 3242.340 | 1.613 | Var 1231 | 3244.269 | 1.616 | Var 1232 | 3246.197 | 1.618 |
|   | Var 1233 | 3248.126 | 1.618 | Var 1234 | 3250.055 | 1.618 | Var 1235 | 3251.984 | 1.619 |
|   | Var 1236 | 3253.913 | 1.620 | Var 1237 | 3255.841 | 1.621 | Var 1238 | 3257.770 | 1.621 |
|   | Var 1239 | 3259.699 | 1.622 | Var 1240 | 3261.628 | 1.622 | Var 1241 | 3263.557 | 1.623 |
|   | Var 1242 | 3265.485 | 1.624 | Var 1243 | 3267.414 | 1.625 | Var 1244 | 3269.343 | 1.625 |
|   | Var 1245 | 3271.272 | 1.625 | Var 1246 | 3273.201 | 1.626 | Var 1247 | 3275.130 | 1.628 |
|   | Var 1248 | 3277.058 | 1.629 | Var 1249 | 3278.987 | 1.629 | Var 1250 | 3280.916 | 1.629 |
|   | Var 1251 | 3282.845 | 1.631 | Var 1252 | 3284.774 | 1.631 | Var 1253 | 3286.702 | 1.632 |
|   | Var 1254 | 3288.631 | 1.633 | Var 1255 | 3290.560 | 1.634 | Var 1256 | 3292.489 | 1.635 |
|   | Var 1257 | 3294.418 | 1.635 | Var 1258 | 3296.347 | 1.635 | Var 1259 | 3298.275 | 1.636 |
|   | Var 1260 | 3300.204 | 1.637 | Var 1261 | 3302.133 | 1.638 | Var 1262 | 3304.062 | 1.639 |
|   | Var 1263 | 3305.991 | 1.640 | Var 1264 | 3307.919 | 1.641 | Var 1265 | 3309.848 | 1.643 |
|   | Var 1266 | 3311.777 | 1.644 | Var 1267 | 3313.706 | 1.645 | Var 1268 | 3315.635 | 1.646 |
|   | Var 1269 | 3317.564 | 1.647 | Var 1270 | 3319.492 | 1.648 | Var 1271 | 3321.421 | 1.650 |
|   | Var 1272 | 3323.350 | 1.651 | Var 1273 | 3325.279 | 1.653 | Var 1274 | 3327.208 | 1.655 |
|   | Var 1275 | 3329.136 | 1.656 | Var 1276 | 3331.065 | 1.657 | Var 1277 | 3332.994 | 1.657 |
|   | Var 1278 | 3334.923 | 1.659 | Var 1279 | 3336.852 | 1.662 | Var 1280 | 3338.780 | 1.663 |

**Table S1** Wave number markers screened in rice groups

|          |          |       |          |          |       |          |          |       |
|----------|----------|-------|----------|----------|-------|----------|----------|-------|
| Var 1281 | 3340.709 | 1.665 | Var 1282 | 3342.638 | 1.667 | Var 1283 | 3344.567 | 1.668 |
| Var 1284 | 3346.496 | 1.670 | Var 1285 | 3348.425 | 1.671 | Var 1286 | 3350.353 | 1.672 |
| Var 1287 | 3352.282 | 1.673 | Var 1288 | 3354.211 | 1.675 | Var 1289 | 3356.140 | 1.677 |
| Var 1290 | 3358.069 | 1.679 | Var 1291 | 3359.997 | 1.680 | Var 1292 | 3361.926 | 1.682 |
| Var 1293 | 3363.855 | 1.684 | Var 1294 | 3365.784 | 1.686 | Var 1295 | 3367.713 | 1.688 |
| Var 1296 | 3369.642 | 1.689 | Var 1297 | 3371.570 | 1.690 | Var 1298 | 3373.499 | 1.691 |
| Var 1299 | 3375.428 | 1.693 | Var 1300 | 3377.357 | 1.695 | Var 1301 | 3379.286 | 1.696 |
| Var 1302 | 3381.214 | 1.696 | Var 1303 | 3383.143 | 1.698 | Var 1304 | 3385.072 | 1.700 |
| Var 1305 | 3387.001 | 1.701 | Var 1306 | 3388.930 | 1.700 | Var 1307 | 3390.859 | 1.700 |
| Var 1308 | 3392.787 | 1.703 | Var 1309 | 3394.716 | 1.704 | Var 1310 | 3396.645 | 1.705 |
| Var 1311 | 3398.574 | 1.707 | Var 1312 | 3400.503 | 1.707 | Var 1313 | 3402.431 | 1.708 |
| Var 1314 | 3404.360 | 1.709 | Var 1315 | 3406.289 | 1.710 | Var 1316 | 3408.218 | 1.710 |
| Var 1317 | 3410.147 | 1.711 | Var 1318 | 3412.076 | 1.712 | Var 1319 | 3414.004 | 1.713 |
| Var 1320 | 3415.933 | 1.712 | Var 1321 | 3417.862 | 1.712 | Var 1322 | 3419.791 | 1.714 |
| Var 1323 | 3421.720 | 1.718 | Var 1324 | 3423.648 | 1.718 | Var 1325 | 3425.577 | 1.717 |
| Var 1326 | 3427.506 | 1.716 | Var 1327 | 3429.435 | 1.717 | Var 1328 | 3431.364 | 1.718 |
| Var 1329 | 3433.292 | 1.719 | Var 1330 | 3435.221 | 1.718 | Var 1331 | 3437.150 | 1.718 |
| Var 1332 | 3439.079 | 1.718 | Var 1333 | 3441.008 | 1.718 | Var 1334 | 3442.937 | 1.718 |
| Var 1335 | 3444.865 | 1.716 | Var 1336 | 3446.794 | 1.721 | Var 1337 | 3448.723 | 1.723 |
| Var 1338 | 3450.652 | 1.720 | Var 1339 | 3452.581 | 1.719 | Var 1340 | 3454.509 | 1.719 |
| Var 1341 | 3456.438 | 1.718 | Var 1342 | 3458.367 | 1.717 | Var 1343 | 3460.296 | 1.717 |
| Var 1344 | 3462.225 | 1.718 | Var 1345 | 3464.154 | 1.717 | Var 1346 | 3466.082 | 1.716 |
| Var 1347 | 3468.011 | 1.716 | Var 1348 | 3469.940 | 1.715 | Var 1349 | 3471.869 | 1.714 |
| Var 1350 | 3473.798 | 1.714 | Var 1351 | 3475.726 | 1.714 | Var 1352 | 3477.655 | 1.709 |
| Var 1353 | 3479.584 | 1.707 | Var 1354 | 3481.513 | 1.712 | Var 1355 | 3483.442 | 1.712 |
| Var 1356 | 3485.371 | 1.708 | Var 1357 | 3487.299 | 1.709 | Var 1358 | 3489.228 | 1.710 |
| Var 1359 | 3491.157 | 1.707 | Var 1360 | 3493.086 | 1.704 | Var 1361 | 3495.015 | 1.705 |
| Var 1362 | 3496.943 | 1.704 | Var 1363 | 3498.872 | 1.698 | Var 1364 | 3500.801 | 1.694 |
| Var 1365 | 3502.730 | 1.701 | Var 1366 | 3504.659 | 1.703 | Var 1367 | 3506.587 | 1.695 |
| Var 1368 | 3508.516 | 1.696 | Var 1369 | 3510.445 | 1.700 | Var 1370 | 3512.374 | 1.698 |
| Var 1371 | 3514.303 | 1.695 | Var 1372 | 3516.232 | 1.692 | Var 1373 | 3518.160 | 1.689 |
| Var 1374 | 3520.089 | 1.683 | Var 1375 | 3522.018 | 1.681 | Var 1376 | 3523.947 | 1.682 |
| Var 1377 | 3525.876 | 1.682 | Var 1378 | 3527.804 | 1.687 | Var 1379 | 3529.733 | 1.689 |
| Var 1380 | 3531.662 | 1.684 | Var 1381 | 3533.591 | 1.677 | Var 1382 | 3535.520 | 1.678 |
| Var 1383 | 3537.449 | 1.679 | Var 1384 | 3539.377 | 1.672 | Var 1385 | 3541.306 | 1.661 |
| Var 1386 | 3543.235 | 1.655 | Var 1387 | 3545.164 | 1.662 | Var 1388 | 3547.093 | 1.670 |
| Var 1389 | 3549.021 | 1.663 | Var 1390 | 3550.950 | 1.660 | Var 1391 | 3552.879 | 1.668 |
| Var 1392 | 3554.808 | 1.664 | Var 1393 | 3556.737 | 1.655 | Var 1394 | 3558.666 | 1.648 |
| Var 1395 | 3560.594 | 1.642 | Var 1396 | 3562.523 | 1.626 | Var 1397 | 3564.452 | 1.609 |
| Var 1398 | 3566.381 | 1.637 | Var 1399 | 3568.31  | 1.661 | Var 1400 | 3570.238 | 1.652 |
| Var 1401 | 3572.167 | 1.642 | Var 1402 | 3574.096 | 1.639 | Var 1403 | 3576.025 | 1.637 |
| Var 1404 | 3577.954 | 1.634 | Var 1405 | 3579.882 | 1.631 | Var 1406 | 3581.811 | 1.619 |
| Var 1407 | 3583.740 | 1.596 | Var 1408 | 3585.669 | 1.590 | Var 1409 | 3587.598 | 1.626 |
| Var 1410 | 3589.527 | 1.627 | Var 1411 | 3591.455 | 1.605 | Var 1412 | 3593.384 | 1.602 |
| Var 1413 | 3595.313 | 1.610 | Var 1414 | 3597.242 | 1.607 | Var 1415 | 3599.171 | 1.606 |
| Var 1416 | 3601.099 | 1.611 | Var 1417 | 3603.028 | 1.596 | Var 1418 | 3604.957 | 1.571 |
| Var 1419 | 3606.886 | 1.570 | Var 1420 | 3608.815 | 1.579 | Var 1421 | 3610.744 | 1.565 |
| Var 1422 | 3612.672 | 1.569 | Var 1423 | 3614.601 | 1.570 | Var 1424 | 3616.530 | 1.549 |
| Var 1425 | 3618.459 | 1.572 | Var 1426 | 3620.388 | 1.592 | Var 1427 | 3622.316 | 1.573 |
| Var 1428 | 3624.245 | 1.538 |          |          |       |          |          |       |
| Var 880  | 2567.254 | 1.800 | Var 881  | 2569.183 | 1.800 | Var 882  | 2571.112 | 1.800 |
| Var 883  | 2573.041 | 1.800 | Var 884  | 2574.969 | 1.800 | Var 885  | 2576.898 | 1.800 |
| Var 886  | 2578.827 | 1.800 | Var 887  | 2580.756 | 1.801 | Var 888  | 2582.685 | 1.801 |
| Var 889  | 2584.613 | 1.801 | Var 890  | 2586.542 | 1.801 | Var 891  | 2588.471 | 1.801 |
| Var 892  | 2590.400 | 1.801 | Var 893  | 2592.329 | 1.801 | Var 894  | 2594.258 | 1.801 |
| Var 895  | 2596.186 | 1.802 | Var 896  | 2598.115 | 1.802 | Var 897  | 2600.044 | 1.802 |
| Var 898  | 2601.973 | 1.802 | Var 899  | 2603.902 | 1.802 | Var 900  | 2605.830 | 1.802 |
| Var 901  | 2607.759 | 1.803 | Var 902  | 2609.688 | 1.802 | Var 903  | 2611.617 | 1.803 |
| Var 904  | 2613.546 | 1.803 | Var 905  | 2615.474 | 1.803 | Var 906  | 2617.403 | 1.803 |
| Var 907  | 2619.332 | 1.803 | Var 908  | 2621.261 | 1.803 | Var 909  | 2623.190 | 1.803 |
| Var 910  | 2625.119 | 1.803 | Var 911  | 2627.047 | 1.803 | Var 912  | 2628.976 | 1.803 |
| Var 913  | 2630.905 | 1.803 | Var 914  | 2632.834 | 1.804 | Var 915  | 2634.763 | 1.804 |
| Var 916  | 2636.691 | 1.804 | Var 917  | 2638.620 | 1.804 | Var 918  | 2640.549 | 1.804 |
| Var 919  | 2642.478 | 1.804 | Var 920  | 2644.407 | 1.804 | Var 921  | 2646.336 | 1.804 |
| Var 922  | 2648.264 | 1.804 | Var 923  | 2650.193 | 1.805 | Var 924  | 2652.122 | 1.805 |
| Var 925  | 2654.051 | 1.805 | Var 926  | 2655.980 | 1.805 | Var 927  | 2657.908 | 1.805 |
| Var 928  | 2659.837 | 1.805 | Var 929  | 2661.766 | 1.805 | Var 930  | 2663.695 | 1.805 |
| Var 931  | 2665.624 | 1.805 | Var 932  | 2667.553 | 1.805 | Var 933  | 2669.481 | 1.806 |
| Var 934  | 2671.410 | 1.806 | Var 935  | 2673.339 | 1.806 | Var 936  | 2675.268 | 1.806 |
| Var 937  | 2677.197 | 1.806 | Var 938  | 2679.125 | 1.806 | Var 939  | 2681.054 | 1.806 |
| Var 940  | 2682.983 | 1.806 | Var 941  | 2684.912 | 1.807 | Var 942  | 2686.841 | 1.807 |
| Var 943  | 2688.770 | 1.807 | Var 944  | 2690.698 | 1.807 | Var 945  | 2692.627 | 1.807 |
| Var 946  | 2694.556 | 1.807 | Var 947  | 2696.485 | 1.807 | Var 948  | 2698.414 | 1.807 |
| Var 949  | 2700.342 | 1.807 | Var 950  | 2702.271 | 1.807 | Var 951  | 2704.200 | 1.808 |
| Var 952  | 2706.129 | 1.808 | Var 953  | 2708.058 | 1.808 | Var 954  | 2709.986 | 1.808 |
| Var 955  | 2711.915 | 1.808 | Var 956  | 2713.844 | 1.808 | Var 957  | 2715.773 | 1.808 |
| Var 958  | 2717.702 | 1.808 | Var 959  | 2719.631 | 1.808 | Var 960  | 2721.559 | 1.808 |
| Var 961  | 2723.488 | 1.809 | Var 962  | 2725.417 | 1.809 | Var 963  | 2727.346 | 1.809 |
| Var 964  | 2729.275 | 1.809 | Var 965  | 2731.203 | 1.809 | Var 966  | 2733.132 | 1.809 |
| Var 967  | 2735.061 | 1.809 | Var 968  | 2736.990 | 1.809 | Var 969  | 2738.919 | 1.810 |
| Var 970  | 2740.848 | 1.810 | Var 971  | 2742.776 | 1.810 | Var 972  | 2744.705 | 1.810 |
| Var 973  | 2746.634 | 1.810 | Var 974  | 2748.563 | 1.810 | Var 975  | 2750.492 | 1.810 |
| Var 976  | 2752.420 | 1.810 | Var 977  | 2754.349 | 1.811 | Var 978  | 2756.278 | 1.811 |
| Var 979  | 2758.207 | 1.811 | Var 980  | 2760.136 | 1.811 | Var 981  | 2762.065 | 1.812 |
| Var 982  | 2763.993 | 1.812 | Var 983  | 2765.922 | 1.812 | Var 984  | 2767.851 | 1.812 |
| Var 985  | 2769.780 | 1.812 | Var 986  | 2771.709 | 1.812 | Var 987  | 2773.637 | 1.812 |

**Table S1** Wave number markers screened in rice groups

|       |          |          |       |          |          |       |          |          |       |
|-------|----------|----------|-------|----------|----------|-------|----------|----------|-------|
|       | Var 988  | 2775.566 | 1.813 | Var 989  | 2777.495 | 1.813 | Var 990  | 2779.424 | 1.813 |
|       | Var 991  | 2781.353 | 1.813 | Var 992  | 2783.281 | 1.813 | Var 993  | 2785.210 | 1.813 |
|       | Var 994  | 2787.139 | 1.813 | Var 995  | 2789.068 | 1.813 | Var 996  | 2790.997 | 1.813 |
|       | Var 997  | 2792.926 | 1.813 | Var 998  | 2794.854 | 1.813 | Var 999  | 2796.783 | 1.813 |
|       | Var 1000 | 2798.712 | 1.813 | Var 1001 | 2800.641 | 1.813 | Var 1002 | 2802.570 | 1.813 |
|       | Var 1003 | 2804.498 | 1.813 | Var 1004 | 2806.427 | 1.813 | Var 1005 | 2808.356 | 1.812 |
|       | Var 1006 | 2810.285 | 1.812 | Var 1007 | 2812.214 | 1.812 | Var 1008 | 2814.143 | 1.812 |
|       | Var 1009 | 2816.071 | 1.812 | Var 1010 | 2818.000 | 1.812 | Var 1011 | 2819.929 | 1.812 |
|       | Var 1012 | 2821.858 | 1.812 | Var 1013 | 2823.787 | 1.811 | Var 1014 | 2825.715 | 1.811 |
|       | Var 1015 | 2827.644 | 1.811 | Var 1016 | 2829.573 | 1.811 | Var 1017 | 2831.502 | 1.811 |
|       | Var 1018 | 2833.431 | 1.810 | Var 1019 | 2835.360 | 1.810 | Var 1020 | 2837.288 | 1.809 |
|       | Var 1021 | 2839.217 | 1.809 | Var 1022 | 2841.146 | 1.809 | Var 1023 | 2843.075 | 1.808 |
|       | Var 1024 | 2845.004 | 1.808 | Var 1025 | 2846.932 | 1.807 | Var 1026 | 2848.861 | 1.806 |
|       | Var 1027 | 2850.790 | 1.806 | Var 1028 | 2852.719 | 1.805 | Var 1029 | 2854.648 | 1.805 |
|       | Var 1030 | 2856.576 | 1.804 | Var 1031 | 2858.505 | 1.804 | Var 1032 | 2860.434 | 1.804 |
|       | Var 1033 | 2862.363 | 1.804 | Var 1034 | 2864.292 | 1.804 | Var 1035 | 2866.221 | 1.803 |
|       | Var 1036 | 2868.149 | 1.803 | Var 1037 | 2870.078 | 1.802 | Var 1038 | 2872.007 | 1.800 |
| ----- | Var 1278 | 3334.923 | 1.690 | Var 1279 | 3336.852 | 1.691 | Var 1280 | 3338.780 | 1.691 |
|       | Var 1281 | 3340.709 | 1.692 | Var 1282 | 3342.638 | 1.693 | Var 1283 | 3344.567 | 1.693 |
|       | Var 1284 | 3346.496 | 1.694 | Var 1285 | 3348.425 | 1.695 | Var 1286 | 3350.353 | 1.695 |
|       | Var 1287 | 3352.282 | 1.695 | Var 1288 | 3354.211 | 1.696 | Var 1289 | 3356.140 | 1.697 |
|       | Var 1290 | 3358.069 | 1.697 | Var 1291 | 3359.997 | 1.698 | Var 1292 | 3361.926 | 1.698 |
|       | Var 1293 | 3363.855 | 1.699 | Var 1294 | 3365.784 | 1.699 | Var 1295 | 3367.713 | 1.700 |
|       | Var 1296 | 3369.642 | 1.700 | Var 1297 | 3371.570 | 1.701 | Var 1298 | 3373.499 | 1.702 |
|       | Var 1299 | 3375.428 | 1.702 | Var 1300 | 3377.357 | 1.703 | Var 1301 | 3379.286 | 1.703 |
|       | Var 1302 | 3381.214 | 1.703 | Var 1303 | 3383.143 | 1.704 | Var 1304 | 3385.072 | 1.705 |
|       | Var 1305 | 3387.001 | 1.705 | Var 1306 | 3388.930 | 1.704 | Var 1307 | 3390.859 | 1.704 |
|       | Var 1308 | 3392.787 | 1.705 | Var 1309 | 3394.716 | 1.705 | Var 1310 | 3396.645 | 1.705 |
|       | Var 1311 | 3398.574 | 1.706 | Var 1312 | 3400.503 | 1.706 | Var 1313 | 3402.431 | 1.706 |
|       | Var 1314 | 3404.360 | 1.707 | Var 1315 | 3406.289 | 1.707 | Var 1316 | 3408.218 | 1.707 |
|       | Var 1317 | 3410.147 | 1.707 | Var 1318 | 3412.076 | 1.707 | Var 1319 | 3414.004 | 1.707 |
|       | Var 1320 | 3415.933 | 1.707 | Var 1321 | 3417.862 | 1.707 | Var 1322 | 3419.791 | 1.708 |
|       | Var 1323 | 3421.720 | 1.710 | Var 1324 | 3423.648 | 1.711 | Var 1325 | 3425.577 | 1.711 |
|       | Var 1326 | 3427.506 | 1.711 | Var 1327 | 3429.435 | 1.712 | Var 1328 | 3431.364 | 1.712 |
|       | Var 1329 | 3433.292 | 1.713 | Var 1330 | 3435.221 | 1.713 | Var 1331 | 3437.150 | 1.713 |
|       | Var 1332 | 3439.079 | 1.713 | Var 1333 | 3441.008 | 1.714 | Var 1334 | 3442.937 | 1.713 |
| 9     | Var 1335 | 3444.865 | 1.713 | Var 1336 | 3446.794 | 1.714 | Var 1337 | 3448.723 | 1.715 |
|       | Var 1338 | 3450.652 | 1.715 | Var 1339 | 3452.581 | 1.715 | Var 1340 | 3454.509 | 1.715 |
|       | Var 1341 | 3456.438 | 1.714 | Var 1342 | 3458.367 | 1.714 | Var 1343 | 3460.296 | 1.713 |
|       | Var 1344 | 3462.225 | 1.714 | Var 1345 | 3464.154 | 1.714 | Var 1346 | 3466.082 | 1.713 |
|       | Var 1347 | 3468.011 | 1.713 | Var 1348 | 3469.940 | 1.713 | Var 1349 | 3471.869 | 1.713 |
|       | Var 1350 | 3473.798 | 1.713 | Var 1351 | 3475.726 | 1.713 | Var 1352 | 3477.655 | 1.711 |
|       | Var 1353 | 3479.584 | 1.710 | Var 1354 | 3481.513 | 1.711 | Var 1355 | 3483.442 | 1.712 |
|       | Var 1356 | 3485.371 | 1.711 | Var 1357 | 3487.299 | 1.711 | Var 1358 | 3489.228 | 1.712 |
|       | Var 1359 | 3491.157 | 1.711 | Var 1360 | 3493.086 | 1.710 | Var 1361 | 3495.015 | 1.711 |
|       | Var 1362 | 3496.943 | 1.711 | Var 1363 | 3498.872 | 1.709 | Var 1364 | 3500.801 | 1.707 |
|       | Var 1365 | 3502.73  | 1.709 | Var 1366 | 3504.659 | 1.710 | Var 1367 | 3506.587 | 1.709 |
|       | Var 1368 | 3508.516 | 1.709 | Var 1369 | 3510.445 | 1.711 | Var 1370 | 3512.374 | 1.711 |
|       | Var 1371 | 3514.303 | 1.710 | Var 1372 | 3516.232 | 1.709 | Var 1373 | 3518.160 | 1.708 |
|       | Var 1374 | 3520.089 | 1.706 | Var 1375 | 3522.018 | 1.704 | Var 1376 | 3523.947 | 1.704 |
|       | Var 1377 | 3525.876 | 1.704 | Var 1378 | 3527.804 | 1.706 | Var 1379 | 3529.733 | 1.707 |
|       | Var 1380 | 3531.662 | 1.707 | Var 1381 | 3533.591 | 1.704 | Var 1382 | 3535.520 | 1.704 |
|       | Var 1383 | 3537.449 | 1.705 | Var 1384 | 3539.377 | 1.703 | Var 1385 | 3541.306 | 1.698 |
|       | Var 1386 | 3543.235 | 1.694 | Var 1387 | 3545.164 | 1.694 | Var 1388 | 3547.093 | 1.697 |
|       | Var 1389 | 3549.021 | 1.697 | Var 1390 | 3550.950 | 1.696 | Var 1391 | 3552.879 | 1.699 |
|       | Var 1392 | 3554.808 | 1.699 | Var 1393 | 3556.737 | 1.696 | Var 1394 | 3558.666 | 1.694 |
|       | Var 1395 | 3560.594 | 1.691 |          |          |       |          |          |       |
| ----- | Var 1251 | 3282.845 | 1.730 | Var 1252 | 3284.774 | 1.730 | Var 1253 | 3286.702 | 1.731 |
|       | Var 1254 | 3288.631 | 1.731 | Var 1255 | 3290.560 | 1.731 | Var 1256 | 3292.489 | 1.731 |
|       | Var 1257 | 3294.418 | 1.731 | Var 1258 | 3296.347 | 1.731 | Var 1259 | 3298.275 | 1.732 |
|       | Var 1260 | 3300.204 | 1.732 | Var 1261 | 3302.133 | 1.732 | Var 1262 | 3304.062 | 1.732 |
|       | Var 1263 | 3305.991 | 1.733 | Var 1264 | 3307.919 | 1.733 | Var 1265 | 3309.848 | 1.733 |
|       | Var 1266 | 3311.777 | 1.734 | Var 1267 | 3313.706 | 1.734 | Var 1268 | 3315.635 | 1.734 |
|       | Var 1269 | 3317.564 | 1.735 | Var 1270 | 3319.492 | 1.735 | Var 1271 | 3321.421 | 1.735 |
|       | Var 1272 | 3323.350 | 1.735 | Var 1273 | 3325.279 | 1.736 | Var 1274 | 3327.208 | 1.736 |
|       | Var 1275 | 3329.136 | 1.737 | Var 1276 | 3331.065 | 1.737 | Var 1277 | 3332.994 | 1.737 |
|       | Var 1278 | 3334.923 | 1.737 | Var 1279 | 3336.852 | 1.737 | Var 1280 | 3338.780 | 1.738 |
|       | Var 1281 | 3340.709 | 1.738 | Var 1282 | 3342.638 | 1.739 | Var 1283 | 3344.567 | 1.739 |
|       | Var 1284 | 3346.496 | 1.740 | Var 1285 | 3348.425 | 1.740 | Var 1286 | 3350.353 | 1.740 |
|       | Var 1287 | 3352.282 | 1.740 | Var 1288 | 3354.211 | 1.740 | Var 1289 | 3356.140 | 1.741 |
|       | Var 1290 | 3358.069 | 1.741 | Var 1291 | 3359.997 | 1.741 | Var 1292 | 3361.926 | 1.741 |
| 10    | Var 1293 | 3363.855 | 1.742 | Var 1294 | 3365.784 | 1.742 | Var 1295 | 3367.713 | 1.742 |
|       | Var 1296 | 3369.642 | 1.742 | Var 1297 | 3371.570 | 1.743 | Var 1298 | 3373.499 | 1.743 |
|       | Var 1299 | 3375.428 | 1.743 | Var 1300 | 3377.357 | 1.744 | Var 1301 | 3379.286 | 1.744 |
|       | Var 1302 | 3381.214 | 1.744 | Var 1303 | 3383.143 | 1.744 | Var 1304 | 3385.072 | 1.744 |
|       | Var 1305 | 3387.001 | 1.745 | Var 1306 | 3388.930 | 1.744 | Var 1307 | 3390.859 | 1.744 |
|       | Var 1308 | 3392.787 | 1.744 | Var 1309 | 3394.716 | 1.744 | Var 1310 | 3396.645 | 1.745 |
|       | Var 1311 | 3398.574 | 1.745 | Var 1312 | 3400.503 | 1.745 | Var 1313 | 3402.431 | 1.745 |
|       | Var 1314 | 3404.360 | 1.745 | Var 1315 | 3406.289 | 1.745 | Var 1316 | 3408.218 | 1.745 |
|       | Var 1317 | 3410.147 | 1.745 | Var 1318 | 3412.076 | 1.745 | Var 1319 | 3414.004 | 1.745 |
|       | Var 1320 | 3415.933 | 1.745 | Var 1321 | 3417.862 | 1.745 | Var 1322 | 3419.791 | 1.745 |
|       | Var 1323 | 3421.720 | 1.746 | Var 1324 | 3423.648 | 1.746 | Var 1325 | 3425.577 | 1.746 |
|       | Var 1326 | 3427.506 | 1.746 | Var 1327 | 3429.435 | 1.746 | Var 1328 | 3431.364 | 1.746 |
|       | Var 1329 | 3433.292 | 1.746 | Var 1330 | 3435.221 | 1.746 | Var 1331 | 3437.150 | 1.746 |
|       | Var 1332 | 3439.079 | 1.747 | Var 1333 | 3441.008 | 1.747 | Var 1334 | 3442.937 | 1.746 |
| ----- | Var 1335 | 3444.865 | 1.746 | Var 1336 | 3446.794 | 1.746 | Var 1337 | 3448.723 | 1.746 |

**Table S1** Wave number markers screened in rice groups

|    |          |          |       |          |          |       |          |          |       |
|----|----------|----------|-------|----------|----------|-------|----------|----------|-------|
|    | Var 1338 | 3450.652 | 1.747 | Var 1339 | 3452.581 | 1.746 | Var 1340 | 3454.509 | 1.746 |
|    | Var 1341 | 3456.438 | 1.746 | Var 1342 | 3458.367 | 1.746 | Var 1343 | 3460.296 | 1.745 |
|    | Var 1344 | 3462.225 | 1.745 | Var 1345 | 3464.154 | 1.745 | Var 1346 | 3466.082 | 1.745 |
|    | Var 1347 | 3468.011 | 1.744 | Var 1348 | 3469.940 | 1.744 | Var 1349 | 3471.869 | 1.745 |
|    | Var 1350 | 3473.798 | 1.745 | Var 1351 | 3475.726 | 1.744 | Var 1352 | 3477.655 | 1.744 |
|    | Var 1353 | 3479.584 | 1.743 | Var 1354 | 3481.513 | 1.743 | Var 1355 | 3483.442 | 1.743 |
|    | Var 1356 | 3485.371 | 1.743 | Var 1357 | 3487.299 | 1.743 | Var 1358 | 3489.228 | 1.743 |
|    | Var 1359 | 3491.157 | 1.743 | Var 1360 | 3493.086 | 1.742 | Var 1361 | 3495.015 | 1.742 |
|    | Var 1362 | 3496.943 | 1.742 | Var 1363 | 3498.872 | 1.741 | Var 1364 | 3500.801 | 1.740 |
|    | Var 1365 | 3502.730 | 1.740 | Var 1366 | 3504.659 | 1.740 | Var 1367 | 3506.587 | 1.740 |
|    | Var 1368 | 3508.516 | 1.740 | Var 1369 | 3510.445 | 1.740 | Var 1370 | 3512.374 | 1.740 |
|    | Var 1371 | 3514.303 | 1.740 | Var 1372 | 3516.232 | 1.740 | Var 1373 | 3518.160 | 1.739 |
|    | Var 1374 | 3520.089 | 1.738 | Var 1375 | 3522.018 | 1.736 | Var 1376 | 3523.947 | 1.735 |
|    | Var 1377 | 3525.876 | 1.735 | Var 1378 | 3527.804 | 1.736 | Var 1379 | 3529.733 | 1.737 |
|    | Var 1380 | 3531.662 | 1.737 | Var 1381 | 3533.591 | 1.736 | Var 1382 | 3535.520 | 1.735 |
|    | Var 1383 | 3537.449 | 1.735 | Var 1384 | 3539.377 | 1.735 | Var 1385 | 3541.306 | 1.733 |
|    | Var 1386 | 3543.235 | 1.730 |          |          |       |          |          |       |
| 11 | Var 1280 | 3338.780 | 1.701 | Var 1281 | 3340.709 | 1.701 | Var 1282 | 3342.638 | 1.702 |
|    | Var 1283 | 3344.567 | 1.702 | Var 1284 | 3346.496 | 1.703 | Var 1285 | 3348.425 | 1.704 |
|    | Var 1286 | 3350.353 | 1.705 | Var 1287 | 3352.282 | 1.705 | Var 1288 | 3354.211 | 1.705 |
|    | Var 1289 | 3356.140 | 1.706 | Var 1290 | 3358.069 | 1.707 | Var 1291 | 3359.997 | 1.707 |
|    | Var 1292 | 3361.926 | 1.708 | Var 1293 | 3363.855 | 1.708 | Var 1294 | 3365.784 | 1.709 |
|    | Var 1295 | 3367.713 | 1.711 | Var 1296 | 3369.642 | 1.712 | Var 1297 | 3371.570 | 1.712 |
|    | Var 1298 | 3373.499 | 1.713 | Var 1299 | 3375.428 | 1.713 | Var 1300 | 3377.357 | 1.713 |
|    | Var 1301 | 3379.286 | 1.714 | Var 1302 | 3381.214 | 1.714 | Var 1303 | 3383.143 | 1.714 |
|    | Var 1304 | 3385.072 | 1.716 | Var 1305 | 3387.001 | 1.716 | Var 1306 | 3388.930 | 1.716 |
|    | Var 1307 | 3390.859 | 1.716 | Var 1308 | 3392.787 | 1.717 | Var 1309 | 3394.716 | 1.717 |
|    | Var 1310 | 3396.645 | 1.717 | Var 1311 | 3398.574 | 1.718 | Var 1312 | 3400.503 | 1.719 |
|    | Var 1313 | 3402.431 | 1.719 | Var 1314 | 3404.360 | 1.720 | Var 1315 | 3406.289 | 1.720 |
|    | Var 1316 | 3408.218 | 1.721 | Var 1317 | 3410.147 | 1.721 | Var 1318 | 3412.076 | 1.721 |
|    | Var 1319 | 3414.004 | 1.721 | Var 1320 | 3415.933 | 1.721 | Var 1321 | 3417.862 | 1.719 |
|    | Var 1322 | 3419.791 | 1.720 | Var 1323 | 3421.720 | 1.721 | Var 1324 | 3423.648 | 1.722 |
|    | Var 1325 | 3425.577 | 1.722 | Var 1326 | 3427.506 | 1.721 | Var 1327 | 3429.395 | 1.721 |
|    | Var 1328 | 3431.364 | 1.721 | Var 1329 | 3433.292 | 1.721 | Var 1330 | 3435.221 | 1.721 |
|    | Var 1331 | 3437.150 | 1.721 | Var 1332 | 3439.079 | 1.720 | Var 1333 | 3441.008 | 1.720 |
|    | Var 1334 | 3442.937 | 1.720 | Var 1335 | 3444.865 | 1.718 | Var 1336 | 3446.794 | 1.719 |
|    | Var 1337 | 3448.723 | 1.720 | Var 1338 | 3450.652 | 1.721 | Var 1339 | 3452.581 | 1.720 |
|    | Var 1340 | 3454.509 | 1.719 | Var 1341 | 3456.438 | 1.719 | Var 1342 | 3458.367 | 1.719 |
|    | Var 1343 | 3460.296 | 1.718 | Var 1344 | 3462.225 | 1.718 | Var 1345 | 3464.154 | 1.718 |
|    | Var 1346 | 3466.082 | 1.718 | Var 1347 | 3468.011 | 1.718 | Var 1348 | 3469.940 | 1.717 |
|    | Var 1349 | 3471.869 | 1.716 | Var 1350 | 3473.798 | 1.716 | Var 1351 | 3475.726 | 1.716 |
|    | Var 1352 | 3477.655 | 1.715 | Var 1353 | 3479.584 | 1.713 | Var 1354 | 3481.513 | 1.713 |
|    | Var 1355 | 3483.442 | 1.715 | Var 1356 | 3485.371 | 1.713 | Var 1357 | 3487.299 | 1.713 |
|    | Var 1358 | 3489.228 | 1.713 | Var 1359 | 3491.157 | 1.712 | Var 1360 | 3493.086 | 1.710 |
|    | Var 1361 | 3495.015 | 1.710 | Var 1362 | 3496.943 | 1.711 | Var 1363 | 3498.872 | 1.708 |
|    | Var 1364 | 3500.801 | 1.704 | Var 1365 | 3502.730 | 1.705 | Var 1366 | 3504.659 | 1.709 |
|    | Var 1367 | 3506.587 | 1.705 | Var 1368 | 3508.516 | 1.703 | Var 1369 | 3510.445 | 1.706 |
|    | Var 1370 | 3512.374 | 1.706 | Var 1371 | 3514.303 | 1.705 | Var 1372 | 3516.232 | 1.704 |
|    | Var 1373 | 3518.160 | 1.702 |          |          |       |          |          |       |
| 12 | Var 1207 | 3197.977 | 1.751 | Var 1208 | 3199.906 | 1.752 | Var 1209 | 3201.835 | 1.753 |
|    | Var 1210 | 3203.763 | 1.753 | Var 1211 | 3205.692 | 1.754 | Var 1212 | 3207.621 | 1.754 |
|    | Var 1213 | 3209.550 | 1.754 | Var 1214 | 3211.479 | 1.755 | Var 1215 | 3213.407 | 1.755 |
|    | Var 1216 | 3215.336 | 1.756 | Var 1217 | 3217.265 | 1.756 | Var 1218 | 3219.194 | 1.757 |
|    | Var 1219 | 3221.123 | 1.758 | Var 1220 | 3223.052 | 1.758 | Var 1221 | 3224.980 | 1.758 |
|    | Var 1222 | 3226.909 | 1.758 | Var 1223 | 3228.838 | 1.759 | Var 1224 | 3230.767 | 1.759 |
|    | Var 1225 | 3232.696 | 1.760 | Var 1226 | 3234.624 | 1.760 | Var 1227 | 3236.553 | 1.761 |
|    | Var 1228 | 3238.482 | 1.762 | Var 1229 | 3240.411 | 1.762 | Var 1230 | 3242.340 | 1.762 |
|    | Var 1231 | 3244.269 | 1.762 | Var 1232 | 3246.197 | 1.763 | Var 1233 | 3248.126 | 1.763 |
|    | Var 1234 | 3250.055 | 1.764 | Var 1235 | 3251.984 | 1.764 | Var 1236 | 3253.913 | 1.764 |
|    | Var 1237 | 3255.841 | 1.765 | Var 1238 | 3257.770 | 1.766 | Var 1239 | 3259.699 | 1.766 |
|    | Var 1240 | 3261.628 | 1.766 | Var 1241 | 3263.557 | 1.766 | Var 1242 | 3265.485 | 1.767 |
|    | Var 1243 | 3267.414 | 1.767 | Var 1244 | 3269.343 | 1.767 | Var 1245 | 3271.272 | 1.767 |
|    | Var 1246 | 3273.201 | 1.767 | Var 1247 | 3275.130 | 1.768 | Var 1248 | 3277.058 | 1.769 |
|    | Var 1249 | 3278.987 | 1.769 | Var 1250 | 3280.916 | 1.769 | Var 1251 | 3282.845 | 1.769 |
|    | Var 1252 | 3284.774 | 1.770 | Var 1253 | 3286.702 | 1.770 | Var 1254 | 3288.631 | 1.770 |
|    | Var 1255 | 3290.560 | 1.770 | Var 1256 | 3292.489 | 1.771 | Var 1257 | 3294.418 | 1.771 |
|    | Var 1258 | 3296.347 | 1.772 | Var 1259 | 3298.275 | 1.772 | Var 1260 | 3300.204 | 1.773 |
|    | Var 1261 | 3302.133 | 1.773 | Var 1262 | 3304.062 | 1.773 | Var 1263 | 3305.991 | 1.773 |
|    | Var 1264 | 3307.919 | 1.773 | Var 1265 | 3309.848 | 1.774 | Var 1266 | 3311.777 | 1.775 |
|    | Var 1267 | 3313.706 | 1.776 | Var 1268 | 3315.635 | 1.777 | Var 1269 | 3317.564 | 1.777 |
|    | Var 1270 | 3319.492 | 1.777 | Var 1271 | 3321.421 | 1.778 | Var 1272 | 3323.350 | 1.778 |
|    | Var 1273 | 3325.279 | 1.779 | Var 1274 | 3327.208 | 1.780 | Var 1275 | 3329.136 | 1.781 |
|    | Var 1276 | 3331.065 | 1.781 | Var 1277 | 3332.994 | 1.781 | Var 1278 | 3334.923 | 1.781 |
|    | Var 1279 | 3336.852 | 1.782 | Var 1280 | 3338.780 | 1.783 | Var 1281 | 3340.709 | 1.783 |
|    | Var 1282 | 3342.638 | 1.784 | Var 1283 | 3344.567 | 1.785 | Var 1284 | 3346.496 | 1.786 |
|    | Var 1285 | 3348.425 | 1.787 | Var 1286 | 3350.353 | 1.787 | Var 1287 | 3352.282 | 1.788 |
|    | Var 1288 | 3354.211 | 1.788 | Var 1289 | 3356.140 | 1.789 | Var 1290 | 3358.069 | 1.789 |
|    | Var 1291 | 3359.997 | 1.789 | Var 1292 | 3361.926 | 1.790 | Var 1293 | 3363.855 | 1.790 |
|    | Var 1294 | 3365.784 | 1.791 | Var 1295 | 3367.713 | 1.792 | Var 1296 | 3369.642 | 1.793 |
|    | Var 1297 | 3371.570 | 1.794 | Var 1298 | 3373.499 | 1.794 | Var 1299 | 3375.428 | 1.795 |
|    | Var 1300 | 3377.357 | 1.795 | Var 1301 | 3379.286 | 1.796 | Var 1302 | 3381.214 | 1.796 |
|    | Var 1303 | 3383.143 | 1.796 | Var 1304 | 3385.072 | 1.797 | Var 1305 | 3387.001 | 1.798 |
|    | Var 1306 | 3388.930 | 1.797 | Var 1307 | 3390.859 | 1.796 | Var 1308 | 3392.787 | 1.797 |
|    | Var 1309 | 3394.716 | 1.798 | Var 1310 | 3396.645 | 1.798 | Var 1311 | 3398.574 | 1.798 |
|    | Var 1312 | 3400.503 | 1.798 | Var 1313 | 3402.431 | 1.799 | Var 1314 | 3404.360 | 1.800 |
|    | Var 1315 | 3406.289 | 1.801 | Var 1316 | 3408.218 | 1.801 | Var 1317 | 3410.147 | 1.801 |

**Table S1** Wave number markers screened in rice groups

|    |          |          |       |          |          |       |          |          |       |
|----|----------|----------|-------|----------|----------|-------|----------|----------|-------|
|    | Var 1318 | 3412.076 | 1.801 | Var 1319 | 3414.004 | 1.801 | Var 1320 | 3415.933 | 1.801 |
|    | Var 1321 | 3417.862 | 1.800 | Var 1322 | 3419.791 | 1.800 | Var 1323 | 3421.720 | 1.802 |
|    | Var 1324 | 3423.648 | 1.803 | Var 1325 | 3425.577 | 1.803 | Var 1326 | 3427.506 | 1.803 |
|    | Var 1327 | 3429.435 | 1.803 | Var 1328 | 3431.364 | 1.803 | Var 1329 | 3433.292 | 1.803 |
|    | Var 1330 | 3435.221 | 1.803 | Var 1331 | 3437.150 | 1.803 | Var 1332 | 3439.079 | 1.803 |
|    | Var 1333 | 3441.008 | 1.803 | Var 1334 | 3442.937 | 1.803 | Var 1335 | 3444.865 | 1.801 |
|    | Var 1336 | 3446.794 | 1.802 | Var 1337 | 3448.723 | 1.804 | Var 1338 | 3450.652 | 1.804 |
|    | Var 1339 | 3452.581 | 1.804 | Var 1340 | 3454.509 | 1.803 | Var 1341 | 3456.438 | 1.803 |
|    | Var 1342 | 3458.367 | 1.802 | Var 1343 | 3460.296 | 1.801 | Var 1344 | 3462.225 | 1.801 |
|    | Var 1345 | 3464.154 | 1.801 | Var 1346 | 3466.082 | 1.800 | Var 1347 | 3468.011 | 1.800 |
|    | Var 1348 | 3469.940 | 1.800 | Var 1349 | 3471.869 | 1.799 | Var 1350 | 3473.798 | 1.799 |
|    | Var 1351 | 3475.726 | 1.799 | Var 1352 | 3477.655 | 1.797 | Var 1353 | 3479.584 | 1.795 |
|    | Var 1354 | 3481.513 | 1.796 | Var 1355 | 3483.442 | 1.797 | Var 1356 | 3485.371 | 1.796 |
|    | Var 1357 | 3487.299 | 1.795 | Var 1358 | 3489.228 | 1.796 | Var 1359 | 3491.157 | 1.796 |
|    | Var 1360 | 3493.086 | 1.794 | Var 1361 | 3495.015 | 1.793 | Var 1362 | 3496.943 | 1.794 |
|    | Var 1363 | 3498.872 | 1.791 | Var 1364 | 3500.801 | 1.787 | Var 1365 | 3502.730 | 1.787 |
|    | Var 1366 | 3504.659 | 1.791 | Var 1367 | 3506.587 | 1.789 | Var 1368 | 3508.516 | 1.787 |
|    | Var 1369 | 3510.445 | 1.789 | Var 1370 | 3512.374 | 1.790 | Var 1371 | 3514.303 | 1.789 |
|    | Var 1372 | 3516.232 | 1.788 | Var 1373 | 3518.160 | 1.787 | Var 1374 | 3520.089 | 1.783 |
|    | Var 1375 | 3522.018 | 1.778 | Var 1376 | 3523.947 | 1.777 | Var 1377 | 3525.876 | 1.777 |
|    | Var 1378 | 3527.804 | 1.779 | Var 1379 | 3529.733 | 1.782 | Var 1380 | 3531.662 | 1.782 |
|    | Var 1381 | 3533.591 | 1.779 | Var 1382 | 3535.520 | 1.777 | Var 1383 | 3537.449 | 1.779 |
|    | Var 1384 | 3539.377 | 1.777 | Var 1385 | 3541.306 | 1.770 | Var 1386 | 3543.235 | 1.762 |
|    | Var 1387 | 3545.164 | 1.760 | Var 1388 | 3547.093 | 1.766 | Var 1389 | 3549.021 | 1.768 |
|    | Var 1390 | 3550.950 | 1.764 | Var 1391 | 3552.879 | 1.768 | Var 1392 | 3554.808 | 1.769 |
|    | Var 1393 | 3556.737 | 1.766 | Var 1394 | 3558.666 | 1.761 | Var 1395 | 3560.594 | 1.758 |
|    | Var 1189 | 3163.258 | 1.790 | Var 1190 | 3165.187 | 1.790 | Var 1191 | 3167.116 | 1.790 |
|    | Var 1192 | 3169.045 | 1.790 | Var 1193 | 3170.974 | 1.791 | Var 1194 | 3172.902 | 1.791 |
|    | Var 1195 | 3174.831 | 1.790 | Var 1196 | 3176.760 | 1.790 | Var 1197 | 3178.689 | 1.792 |
|    | Var 1198 | 3180.618 | 1.792 | Var 1199 | 3182.546 | 1.791 | Var 1200 | 3184.475 | 1.792 |
|    | Var 1201 | 3186.404 | 1.792 | Var 1202 | 3188.333 | 1.792 | Var 1203 | 3190.262 | 1.792 |
|    | Var 1204 | 3192.190 | 1.792 | Var 1205 | 3194.119 | 1.792 | Var 1206 | 3196.048 | 1.792 |
|    | Var 1207 | 3197.977 | 1.793 | Var 1208 | 3199.906 | 1.793 | Var 1209 | 3201.835 | 1.793 |
|    | Var 1210 | 3203.763 | 1.793 | Var 1211 | 3205.692 | 1.793 | Var 1212 | 3207.621 | 1.792 |
|    | Var 1213 | 3209.550 | 1.792 | Var 1214 | 3211.479 | 1.792 | Var 1215 | 3213.407 | 1.792 |
| 13 | Var 1216 | 3215.336 | 1.793 | Var 1217 | 3217.265 | 1.792 | Var 1218 | 3219.194 | 1.793 |
|    | Var 1219 | 3221.123 | 1.793 | Var 1220 | 3223.052 | 1.793 | Var 1221 | 3224.980 | 1.792 |
|    | Var 1222 | 3226.909 | 1.792 | Var 1223 | 3228.838 | 1.792 | Var 1224 | 3230.767 | 1.792 |
|    | Var 1225 | 3232.696 | 1.792 | Var 1226 | 3234.624 | 1.791 | Var 1227 | 3236.553 | 1.792 |
|    | Var 1228 | 3238.482 | 1.792 | Var 1229 | 3240.411 | 1.791 | Var 1230 | 3242.340 | 1.790 |
|    | Var 1231 | 3244.269 | 1.791 | Var 1232 | 3246.197 | 1.791 | Var 1233 | 3248.126 | 1.791 |
|    | Var 1234 | 3250.055 | 1.791 | Var 1235 | 3251.984 | 1.790 | Var 1236 | 3253.913 | 1.790 |
|    | Var 1237 | 3255.841 | 1.791 | Var 1238 | 3257.770 | 1.791 | Var 1239 | 3259.699 | 1.791 |
|    | Var 1240 | 3261.628 | 1.790 | Var 1241 | 3263.557 | 1.790 | Var 1242 | 3265.485 | 1.790 |
|    | Var 1243 | 3267.414 | 1.790 |          |          |       |          |          |       |
|    | Var 1256 | 3292.489 | 1.621 | Var 1257 | 3294.418 | 1.621 | Var 1258 | 3296.347 | 1.621 |
|    | Var 1259 | 3298.275 | 1.621 | Var 1260 | 3300.204 | 1.620 | Var 1261 | 3302.133 | 1.620 |
|    | Var 1262 | 3304.062 | 1.621 | Var 1263 | 3305.991 | 1.621 | Var 1264 | 3307.919 | 1.621 |
|    | Var 1265 | 3309.848 | 1.622 | Var 1266 | 3311.777 | 1.622 | Var 1267 | 3313.706 | 1.623 |
|    | Var 1268 | 3315.635 | 1.623 | Var 1269 | 3317.564 | 1.623 | Var 1270 | 3319.492 | 1.623 |
|    | Var 1271 | 3321.421 | 1.623 | Var 1272 | 3323.350 | 1.624 | Var 1273 | 3325.279 | 1.624 |
|    | Var 1274 | 3327.208 | 1.625 | Var 1275 | 3329.136 | 1.626 | Var 1276 | 3331.065 | 1.626 |
|    | Var 1277 | 3332.994 | 1.625 | Var 1278 | 3334.923 | 1.625 | Var 1279 | 3336.852 | 1.627 |
|    | Var 1280 | 3338.780 | 1.628 | Var 1281 | 3340.709 | 1.628 | Var 1282 | 3342.638 | 1.629 |
|    | Var 1283 | 3344.567 | 1.629 | Var 1284 | 3346.496 | 1.630 | Var 1285 | 3348.425 | 1.631 |
|    | Var 1286 | 3350.353 | 1.632 | Var 1287 | 3352.282 | 1.631 | Var 1288 | 3354.211 | 1.630 |
|    | Var 1289 | 3356.140 | 1.631 | Var 1290 | 3358.069 | 1.632 | Var 1291 | 3359.997 | 1.632 |
|    | Var 1292 | 3361.926 | 1.632 | Var 1293 | 3363.855 | 1.632 | Var 1294 | 3365.784 | 1.634 |
|    | Var 1295 | 3367.713 | 1.636 | Var 1296 | 3369.642 | 1.636 | Var 1297 | 3371.570 | 1.636 |
|    | Var 1298 | 3373.499 | 1.636 | Var 1299 | 3375.428 | 1.636 | Var 1300 | 3377.357 | 1.636 |
|    | Var 1301 | 3379.286 | 1.636 | Var 1302 | 3381.214 | 1.636 | Var 1303 | 3383.143 | 1.636 |
| 14 | Var 1304 | 3385.072 | 1.638 | Var 1305 | 3387.001 | 1.638 | Var 1306 | 3388.930 | 1.637 |
|    | Var 1307 | 3390.859 | 1.636 | Var 1308 | 3392.787 | 1.637 | Var 1309 | 3394.716 | 1.637 |
|    | Var 1310 | 3396.645 | 1.636 | Var 1311 | 3398.574 | 1.638 | Var 1312 | 3400.503 | 1.638 |
|    | Var 1313 | 3402.431 | 1.638 | Var 1314 | 3404.360 | 1.638 | Var 1315 | 3406.289 | 1.638 |
|    | Var 1316 | 3408.218 | 1.638 | Var 1317 | 3410.147 | 1.638 | Var 1318 | 3412.076 | 1.638 |
|    | Var 1319 | 3414.004 | 1.637 | Var 1320 | 3415.933 | 1.636 | Var 1321 | 3417.862 | 1.634 |
|    | Var 1322 | 3419.791 | 1.634 | Var 1323 | 3421.720 | 1.637 | Var 1324 | 3423.648 | 1.638 |
|    | Var 1325 | 3425.577 | 1.637 | Var 1326 | 3427.506 | 1.637 | Var 1327 | 3429.435 | 1.637 |
|    | Var 1328 | 3431.364 | 1.637 | Var 1329 | 3433.292 | 1.637 | Var 1330 | 3435.221 | 1.636 |
|    | Var 1331 | 3437.150 | 1.636 | Var 1332 | 3439.079 | 1.635 | Var 1333 | 3441.008 | 1.633 |
|    | Var 1334 | 3442.937 | 1.632 | Var 1335 | 3444.865 | 1.629 | Var 1336 | 3446.794 | 1.631 |
|    | Var 1337 | 3448.723 | 1.635 | Var 1338 | 3450.652 | 1.634 | Var 1339 | 3452.581 | 1.633 |
|    | Var 1340 | 3454.509 | 1.632 | Var 1341 | 3456.438 | 1.631 | Var 1342 | 3458.367 | 1.630 |
|    | Var 1343 | 3460.296 | 1.629 | Var 1344 | 3462.225 | 1.629 | Var 1345 | 3464.154 | 1.629 |
|    | Var 1346 | 3466.082 | 1.628 | Var 1347 | 3468.011 | 1.628 | Var 1348 | 3469.940 | 1.627 |
|    | Var 1349 | 3471.869 | 1.625 | Var 1350 | 3473.798 | 1.625 | Var 1351 | 3475.726 | 1.625 |
|    | Var 1352 | 3477.655 | 1.622 |          |          |       |          |          |       |
|    | Var 156  | 1170.791 | 1.506 | Var 157  | 1172.720 | 1.540 | Var 158  | 1174.649 | 1.567 |
|    | Var 159  | 1176.578 | 1.590 | Var 160  | 1178.507 | 1.610 | Var 161  | 1180.435 | 1.627 |
|    | Var 162  | 1182.364 | 1.640 | Var 163  | 1184.293 | 1.653 | Var 164  | 1186.222 | 1.663 |
|    | Var 165  | 1188.151 | 1.667 | Var 166  | 1190.079 | 1.668 | Var 167  | 1192.008 | 1.673 |
| 18 | Var 168  | 1193.937 | 1.675 | Var 169  | 1195.866 | 1.672 | Var 170  | 1197.795 | 1.667 |
|    | Var 171  | 1199.724 | 1.666 | Var 172  | 1201.652 | 1.661 | Var 173  | 1203.581 | 1.655 |
|    | Var 174  | 1205.510 | 1.653 | Var 175  | 1207.439 | 1.655 | Var 176  | 1209.368 | 1.656 |
|    | Var 177  | 1211.296 | 1.656 | Var 178  | 1213.225 | 1.656 | Var 179  | 1215.154 | 1.661 |



**Table S1** Wave number markers screened in rice groups

|         |          |       |         |          |       |         |          |       |
|---------|----------|-------|---------|----------|-------|---------|----------|-------|
| Var 180 | 1217.083 | 1.664 | Var 181 | 1219.012 | 1.664 | Var 182 | 1220.941 | 1.661 |
| Var 183 | 1222.869 | 1.663 | Var 184 | 1224.798 | 1.658 | Var 185 | 1226.727 | 1.651 |
| Var 186 | 1228.656 | 1.648 | Var 187 | 1230.585 | 1.648 | Var 188 | 1232.513 | 1.643 |
| Var 189 | 1234.442 | 1.636 | Var 190 | 1236.371 | 1.633 | Var 191 | 1238.300 | 1.634 |
| Var 192 | 1240.229 | 1.629 | Var 193 | 1242.158 | 1.630 | Var 194 | 1244.086 | 1.630 |
| Var 195 | 1246.015 | 1.630 | Var 196 | 1247.944 | 1.627 | Var 197 | 1249.873 | 1.629 |
| Var 198 | 1251.802 | 1.631 | Var 199 | 1253.730 | 1.630 | Var 200 | 1255.659 | 1.627 |
| Var 201 | 1257.588 | 1.635 | Var 202 | 1259.517 | 1.628 | Var 203 | 1261.446 | 1.615 |
| Var 204 | 1263.374 | 1.622 | Var 205 | 1265.303 | 1.627 | Var 206 | 1267.232 | 1.627 |
| Var 207 | 1269.161 | 1.630 | Var 208 | 1271.090 | 1.622 | Var 209 | 1273.019 | 1.611 |
| Var 210 | 1274.947 | 1.612 | Var 211 | 1276.876 | 1.614 | Var 212 | 1278.805 | 1.610 |
| Var 213 | 1280.734 | 1.604 | Var 214 | 1282.663 | 1.602 | Var 215 | 1284.591 | 1.605 |
| Var 216 | 1286.520 | 1.605 | Var 217 | 1288.449 | 1.592 | Var 218 | 1290.378 | 1.586 |
| Var 219 | 1292.307 | 1.587 | Var 220 | 1294.236 | 1.591 | Var 221 | 1296.164 | 1.587 |
| Var 222 | 1298.093 | 1.579 | Var 223 | 1300.022 | 1.577 | Var 224 | 1301.951 | 1.577 |
| Var 225 | 1303.880 | 1.576 | Var 226 | 1305.808 | 1.577 | Var 227 | 1307.737 | 1.574 |
| Var 228 | 1309.666 | 1.583 | Var 229 | 1311.595 | 1.595 | Var 230 | 1313.524 | 1.574 |
| Var 231 | 1315.453 | 1.591 | Var 232 | 1317.381 | 1.596 | Var 233 | 1319.310 | 1.550 |
| Var 234 | 1321.239 | 1.541 | Var 235 | 1323.168 | 1.557 | Var 236 | 1325.097 | 1.549 |
| Var 237 | 1327.025 | 1.544 | Var 238 | 1328.954 | 1.538 | Var 239 | 1330.883 | 1.529 |
| Var 240 | 1332.812 | 1.526 | Var 241 | 1334.741 | 1.566 | Var 242 | 1336.669 | 1.625 |
| Var 243 | 1338.598 | 1.591 |         |          |       |         |          |       |

**Table S2** Pairwise t-test results of wave number markers

| Rice No. | Markers  | $P_{15}$ | $P_{16}$ | $P_{17}$ | Markers    | $P_{15}$ | $P_{16}$ | $P_{17}$ | Markers  | $P_{15}$ | $P_{16}$ | $P_{17}$ |
|----------|----------|----------|----------|----------|------------|----------|----------|----------|----------|----------|----------|----------|
|          | 2935.658 | 0.000    | 0.000    | 0.000    | 2937.587   | 0.000    | 0.000    | 0.000    | 2939.516 | 0.000    | 0.000    | 0.000    |
|          | 2941.444 | 0.000    | 0.000    | 0.000    | 2943.373   | 0.000    | 0.000    | 0.000    | 2945.302 | 0.000    | 0.000    | 0.000    |
|          | 2947.231 | 0.000    | 0.000    | 0.000    | 2949.160   | 0.000    | 0.000    | 0.000    | 2951.088 | 0.000    | 0.000    | 0.000    |
|          | 2953.017 | 0.000    | 0.000    | 0.000    | 2954.946   | 0.000    | 0.000    | 0.000    | 2956.875 | 0.000    | 0.000    | 0.000    |
|          | 2958.804 | 0.000    | 0.000    | 0.000    | 2960.733   | 0.000    | 0.000    | 0.000    | 2962.661 | 0.000    | 0.000    | 0.000    |
|          | 2964.59  | 0.000    | 0.000    | 0.000    | 2966.519   | 0.000    | 0.000    | 0.000    | 2968.448 | 0.000    | 0.000    | 0.000    |
|          | 2970.377 | 0.000    | 0.000    | 0.000    | 2972.305   | 0.000    | 0.000    | 0.000    | 2974.234 | 0.000    | 0.000    | 0.000    |
|          | 2976.163 | 0.000    | 0.000    | 0.000    | 2978.092   | 0.000    | 0.000    | 0.000    | 2980.021 | 0.000    | 0.000    | 0.000    |
|          | 2981.950 | 0.000    | 0.000    | 0.000    | 2983.878   | 0.000    | 0.000    | 0.000    | 2985.807 | 0.000    | 0.000    | 0.000    |
|          | 2987.736 | 0.000    | 0.000    | 0.000    | 2989.665   | 0.000    | 0.000    | 0.000    | 2991.594 | 0.000    | 0.000    | 0.000    |
|          | 2993.522 | 0.000    | 0.000    | 0.000    | 2995.451   | 0.000    | 0.000    | 0.000    | 2997.380 | 0.000    | 0.000    | 0.000    |
|          | 2999.309 | 0.000    | 0.000    | 0.000    | 3001.238   | 0.000    | 0.000    | 0.000    | 3003.167 | 0.000    | 0.000    | 0.000    |
|          | 3005.095 | 0.000    | 0.000    | 0.000    | 3007.024   | 0.000    | 0.000    | 0.000    | 3008.953 | 0.000    | 0.000    | 0.000    |
|          | 3010.882 | 0.000    | 0.000    | 0.000    | 3012.811   | 0.000    | 0.000    | 0.000    | 3014.739 | 0.000    | 0.000    | 0.000    |
|          | 3016.668 | 0.000    | 0.000    | 0.000    | 3018.597   | 0.000    | 0.000    | 0.000    | 3020.526 | 0.000    | 0.000    | 0.000    |
|          | 3022.455 | 0.000    | 0.000    | 0.000    | 3024.383   | 0.000    | 0.000    | 0.000    | 3026.312 | 0.000    | 0.000    | 0.000    |
|          | 3028.241 | 0.000    | 0.000    | 0.000    | 3030.170   | 0.000    | 0.000    | 0.000    | 3032.099 | 0.000    | 0.000    | 0.000    |
|          | 3034.028 | 0.000    | 0.000    | 0.000    | 3035.956   | 0.000    | 0.000    | 0.000    | 3037.885 | 0.000    | 0.000    | 0.000    |
|          | 3039.814 | 0.000    | 0.000    | 0.000    | 3041.743   | 0.000    | 0.000    | 0.000    | 3043.672 | 0.000    | 0.000    | 0.000    |
|          | 3045.600 | 0.000    | 0.000    | 0.000    | 3047.529   | 0.000    | 0.000    | 0.000    | 3049.458 | 0.000    | 0.000    | 0.000    |
|          | 3051.387 | 0.000    | 0.000    | 0.000    | 3053.316   | 0.000    | 0.000    | 0.000    | 3055.245 | 0.000    | 0.000    | 0.000    |
|          | 3057.173 | 0.000    | 0.000    | 0.000    | 3059.102   | 0.000    | 0.000    | 0.000    | 3061.031 | 0.000    | 0.000    | 0.000    |
|          | 3062.960 | 0.000    | 0.000    | 0.000    | 3064.889   | 0.000    | 0.000    | 0.000    | 3066.817 | 0.000    | 0.000    | 0.000    |
|          | 3068.746 | 0.000    | 0.000    | 0.000    | 3070.675   | 0.000    | 0.000    | 0.000    | 3072.604 | 0.000    | 0.000    | 0.000    |
|          | 3074.533 | 0.000    | 0.000    | 0.000    | 3076.462   | 0.000    | 0.000    | 0.000    | 3078.390 | 0.000    | 0.000    | 0.000    |
|          | 3080.319 | 0.000    | 0.000    | 0.000    | 3082.248   | 0.000    | 0.000    | 0.000    | 3084.177 | 0.000    | 0.000    | 0.000    |
| 1        | 3086.106 | 0.000    | 0.000    | 0.000    | 3088.034   | 0.000    | 0.000    | 0.000    | 3089.963 | 0.000    | 0.000    | 0.000    |
|          | 3091.892 | 0.000    | 0.000    | 0.000    | 3093.821   | 0.000    | 0.000    | 0.000    | 3095.750 | 0.000    | 0.000    | 0.000    |
|          | 3097.678 | 0.000    | 0.000    | 0.000    | 3099.607   | 0.000    | 0.000    | 0.000    | 3101.536 | 0.000    | 0.000    | 0.000    |
|          | 3103.465 | 0.000    | 0.000    | 0.000    | 3105.394   | 0.000    | 0.000    | 0.000    | 3107.323 | 0.000    | 0.000    | 0.000    |
|          | 3109.251 | 0.000    | 0.000    | 0.000    | 3111.180   | 0.000    | 0.000    | 0.000    | 3113.109 | 0.000    | 0.000    | 0.000    |
|          | 3115.038 | 0.000    | 0.000    | 0.000    | 3116.967   | 0.000    | 0.000    | 0.000    | 3118.895 | 0.000    | 0.000    | 0.000    |
|          | 3120.824 | 0.000    | 0.000    | 0.000    | 3122.753   | 0.000    | 0.000    | 0.000    | 3124.682 | 0.000    | 0.000    | 0.000    |
|          | 3126.611 | 0.000    | 0.000    | 0.000    | 3128.540   | 0.000    | 0.000    | 0.000    | 3130.468 | 0.000    | 0.000    | 0.000    |
|          | 3132.397 | 0.000    | 0.000    | 0.000    | 3134.326   | 0.000    | 0.000    | 0.000    | 3136.255 | 0.000    | 0.000    | 0.000    |
|          | 3138.184 | 0.000    | 0.000    | 0.000    | 3140.112   | 0.000    | 0.000    | 0.000    | 3142.041 | 0.000    | 0.000    | 0.000    |
|          | 3143.970 | 0.000    | 0.000    | 0.000    | 3145.899   | 0.000    | 0.000    | 0.000    | 3147.828 | 0.000    | 0.000    | 0.000    |
|          | 3149.757 | 0.000    | 0.000    | 0.000    | 3151.685   | 0.000    | 0.000    | 0.000    | 3153.614 | 0.000    | 0.000    | 0.000    |
|          | 3155.543 | 0.000    | 0.000    | 0.000    | 3157.472   | 0.000    | 0.000    | 0.000    | 3159.401 | 0.000    | 0.000    | 0.000    |
|          | 3161.329 | 0.000    | 0.000    | 0.000    | 3163.258   | 0.000    | 0.000    | 0.000    | 3165.187 | 0.000    | 0.000    | 0.000    |
|          | 3167.116 | 0.000    | 0.000    | 0.000    | 3169.045   | 0.000    | 0.000    | 0.000    | 3170.974 | 0.000    | 0.000    | 0.000    |
|          | 3172.902 | 0.000    | 0.000    | 0.000    | 3174.831   | 0.000    | 0.000    | 0.000    | 3176.760 | 0.000    | 0.000    | 0.000    |
|          | 3178.689 | 0.000    | 0.000    | 0.000    | 3180.618   | 0.000    | 0.000    | 0.000    | 3182.546 | 0.000    | 0.000    | 0.000    |
|          | 3184.475 | 0.000    | 0.000    | 0.000    | 3186.404   | 0.000    | 0.000    | 0.000    | 3188.333 | 0.000    | 0.000    | 0.000    |
|          | 3190.262 | 0.000    | 0.000    | 0.000    | 3192.190   | 0.000    | 0.000    | 0.000    | 3194.119 | 0.000    | 0.000    | 0.000    |
|          | 3196.048 | 0.000    | 0.000    | 0.000    | 3197.977   | 0.000    | 0.000    | 0.000    | 3199.906 | 0.000    | 0.000    | 0.000    |
|          | 3201.835 | 0.000    | 0.000    | 0.000    | 3203.763   | 0.000    | 0.000    | 0.000    | 3205.692 | 0.000    | 0.000    | 0.000    |
|          | 3207.621 | 0.000    | 0.000    | 0.000    | 3209.55    | 0.000    | 0.000    | 0.000    | 3211.479 | 0.000    | 0.000    | 0.000    |
|          | 3213.407 | 0.000    | 0.000    | 0.000    | 3215.336   | 0.000    | 0.000    | 0.000    | 3217.265 | 0.000    | 0.000    | 0.000    |
|          | 3219.194 | 0.000    | 0.000    | 0.000    | 3221.123   | 0.000    | 0.000    | 0.000    | 3223.052 | 0.000    | 0.000    | 0.000    |
|          | 3224.980 | 0.000    | 0.000    | 0.000    | 3226.909   | 0.000    | 0.000    | 0.000    | 3228.838 | 0.000    | 0.000    | 0.000    |
|          | 3230.767 | 0.000    | 0.000    | 0.000    | 3232.696   | 0.000    | 0.000    | 0.000    | 3234.624 | 0.000    | 0.000    | 0.000    |
|          | 3236.553 | 0.000    | 0.000    | 0.000    | 3238.482   | 0.000    | 0.000    | 0.000    |          |          |          |          |
|          | 3242.340 | 0.000    | 0.000    | 0.000    | 3244.269   | 0.000    | 0.000    | 0.000    |          |          |          |          |
|          | 3248.127 | 0.000    | 0.000    | 0.000    | 3250.055   | 0.000    | 0.000    | 0.000    |          |          |          |          |
|          | 3253.914 | 0.000    | 0.000    | 0.000    | 3255.842   | 0.000    | 0.000    | 0.000    |          |          |          |          |
|          | 3259.701 | 0.000    | 0.000    | 0.000    | 3261.628   | 0.000    | 0.000    | 0.000    |          |          |          |          |
|          | 3265.488 | 0.000    | 0.000    | 0.000    | 3267.415   | 0.000    | 0.000    | 0.000    |          |          |          |          |
|          | 3271.275 | 0.000    | 0.000    | 0.000    | 3273.201   | 0.000    | 0.000    | 0.000    |          |          |          |          |
|          | 3277.062 | 0.000    | 0.000    | 0.000    | 3278.988   | 0.000    | 0.000    | 0.000    |          |          |          |          |
|          | 3282.849 | 0.000    | 0.000    | 0.000    | 3284.774   | 0.000    | 0.000    | 0.000    |          |          |          |          |
|          | 3288.636 | 0.000    | 0.000    | 0.000    | 3290.561   | 0.000    | 0.000    | 0.000    |          |          |          |          |
|          | 3294.423 | 0.000    | 0.000    | 0.000    | 3296.347   | 0.000    | 0.000    | 0.000    |          |          |          |          |
|          | 3300.210 | 0.000    | 0.000    | 0.000    | 3302.134   | 0.000    | 0.000    | 0.000    |          |          |          |          |
|          | 3306.000 | 0.000    | 0.000    | 0.000    | 3307.920   | 0.000    | 0.000    | 0.000    |          |          |          |          |
|          | 3311.787 | 0.000    | 0.000    | 0.000    | 3313.707   | 0.000    | 0.000    | 0.000    |          |          |          |          |
|          | 3317.574 | 0.000    | 0.000    | 0.000    | 3319.493   | 0.000    | 0.000    | 0.000    |          |          |          |          |
|          | 3323.361 | 0.000    | 0.000    | 0.000    | 3325.280   | 0.000    | 0.000    | 0.000    |          |          |          |          |
|          | 3329.148 | 0.000    | 0.000    | 0.000    | 3331.066   | 0.000    | 0.000    | 0.000    |          |          |          |          |
|          | 3334.935 | 0.000    | 0.000    | 0.000    | 3336.853   | 0.000    | 0.000    | 0.000    |          |          |          |          |
|          | 3340.722 | 0.000    | 0.000    | 0.000    | 3342.639   | 0.000    | 0.000    | 0.000    |          |          |          |          |
|          | 3346.509 | 0.000    | 0.000    | 0.000    | 3348.426   | 0.000    | 0.000    | 0.000    |          |          |          |          |
|          | 3352.296 | 0.000    | 0.000    | 0.000    | 3354.212   | 0.000    | 0.000    | 0.000    |          |          |          |          |
|          | 3358.083 | 0.000    | 0.000    | 0.000    | 3360.000   | 0.000    | 0.000    | 0.000    |          |          |          |          |
|          | 3363.870 | 0.000    | 0.000    | 0.000    | 3365.786   | 0.000    | 0.000    | 0.000    |          |          |          |          |
|          | 3369.657 | 0.000    | 0.000    | 0.000    | 3371.573</ |          |          |          |          |          |          |          |

**Table S2** Pairwise t-test results of wave number markers

|   |          |       |       |       |          |       |       |       |          |       |       |       |
|---|----------|-------|-------|-------|----------|-------|-------|-------|----------|-------|-------|-------|
|   | 3938.642 | 0.000 | 0.000 | 0.000 | 3940.571 | 0.000 | 0.000 | 0.000 | 3942.500 | 0.000 | 0.000 | 0.000 |
|   | 3944.429 | 0.000 | 0.000 | 0.000 | 3946.358 | 0.000 | 0.000 | 0.000 | 3948.286 | 0.000 | 0.000 | 0.000 |
|   | 3950.215 | 0.000 | 0.000 | 0.000 | 3952.144 | 0.000 | 0.000 | 0.000 | 3954.073 | 0.000 | 0.000 | 0.000 |
|   | 3956.002 | 0.000 | 0.000 | 0.000 | 3957.930 | 0.000 | 0.000 | 0.000 | 3959.859 | 0.000 | 0.000 | 0.000 |
|   | 3961.788 | 0.000 | 0.000 | 0.000 | 3963.717 | 0.000 | 0.000 | 0.000 | 3965.646 | 0.000 | 0.000 | 0.000 |
|   | 3967.575 | 0.000 | 0.000 | 0.000 | 3969.503 | 0.000 | 0.000 | 0.000 | 3971.432 | 0.000 | 0.000 | 0.000 |
|   | 3973.361 | 0.000 | 0.000 | 0.000 | 3975.290 | 0.000 | 0.000 | 0.000 | 3977.219 | 0.000 | 0.000 | 0.000 |
|   | 3979.147 | 0.000 | 0.000 | 0.000 | 3981.076 | 0.000 | 0.000 | 0.000 | 3983.005 | 0.000 | 0.000 | 0.000 |
|   | 3984.934 | 0.000 | 0.000 | 0.000 | 3986.863 | 0.000 | 0.000 | 0.000 | 3988.791 | 0.000 | 0.000 | 0.000 |
|   | 3990.720 | 0.000 | 0.000 | 0.000 | 3992.649 | 0.000 | 0.000 | 0.000 | 3994.578 | 0.000 | 0.000 | 0.000 |
|   | 3996.507 | 0.000 | 0.000 | 0.000 | 3998.436 | 0.000 | 0.000 | 0.000 | 4000.364 | 0.000 | 0.000 | 0.000 |
|   | 3329.136 | 0.000 | 0.000 | 0.000 | 3331.065 | 0.000 | 0.000 | 0.000 | 3332.994 | 0.000 | 0.000 | 0.000 |
|   | 3334.923 | 0.000 | 0.000 | 0.000 | 3336.852 | 0.000 | 0.000 | 0.000 | 3338.780 | 0.000 | 0.000 | 0.000 |
|   | 3340.709 | 0.000 | 0.000 | 0.000 | 3342.638 | 0.000 | 0.000 | 0.000 | 3344.567 | 0.000 | 0.000 | 0.000 |
|   | 3346.496 | 0.000 | 0.000 | 0.000 | 3348.425 | 0.000 | 0.000 | 0.000 | 3350.353 | 0.000 | 0.000 | 0.000 |
|   | 3352.282 | 0.000 | 0.000 | 0.000 | 3354.211 | 0.000 | 0.000 | 0.000 | 3356.140 | 0.000 | 0.000 | 0.000 |
|   | 3358.069 | 0.000 | 0.000 | 0.000 | 3359.997 | 0.000 | 0.000 | 0.000 | 3361.926 | 0.000 | 0.000 | 0.000 |
|   | 3363.855 | 0.000 | 0.000 | 0.000 | 3365.784 | 0.000 | 0.000 | 0.000 | 3367.713 | 0.000 | 0.000 | 0.000 |
|   | 3369.642 | 0.000 | 0.000 | 0.000 | 3371.570 | 0.000 | 0.000 | 0.000 | 3373.499 | 0.000 | 0.000 | 0.000 |
|   | 3375.428 | 0.000 | 0.000 | 0.000 | 3377.357 | 0.000 | 0.000 | 0.000 | 3379.286 | 0.000 | 0.000 | 0.000 |
|   | 3381.214 | 0.000 | 0.000 | 0.000 | 3383.143 | 0.000 | 0.000 | 0.000 | 3385.072 | 0.000 | 0.000 | 0.000 |
|   | 3387.001 | 0.000 | 0.000 | 0.000 | 3388.930 | 0.000 | 0.000 | 0.000 | 3390.859 | 0.000 | 0.000 | 0.000 |
|   | 3392.787 | 0.000 | 0.000 | 0.000 | 3394.716 | 0.000 | 0.000 | 0.000 | 3396.645 | 0.000 | 0.000 | 0.000 |
|   | 3398.574 | 0.000 | 0.000 | 0.000 | 3400.503 | 0.000 | 0.000 | 0.000 | 3402.431 | 0.000 | 0.000 | 0.000 |
|   | 3404.360 | 0.000 | 0.000 | 0.000 | 3406.289 | 0.000 | 0.000 | 0.000 | 3408.218 | 0.000 | 0.000 | 0.000 |
| 3 | 3410.147 | 0.000 | 0.000 | 0.000 | 3412.076 | 0.000 | 0.000 | 0.000 | 3414.004 | 0.000 | 0.000 | 0.000 |
|   | 3415.933 | 0.000 | 0.000 | 0.000 | 3417.862 | 0.000 | 0.000 | 0.000 | 3419.791 | 0.000 | 0.000 | 0.000 |
|   | 3421.720 | 0.000 | 0.000 | 0.000 | 3423.648 | 0.000 | 0.000 | 0.000 | 3425.577 | 0.000 | 0.000 | 0.000 |
|   | 3427.506 | 0.000 | 0.000 | 0.000 | 3429.435 | 0.000 | 0.000 | 0.000 | 3431.364 | 0.000 | 0.000 | 0.000 |
|   | 3433.292 | 0.000 | 0.000 | 0.000 | 3435.221 | 0.000 | 0.000 | 0.000 | 3437.150 | 0.000 | 0.000 | 0.000 |
|   | 3439.079 | 0.000 | 0.000 | 0.000 | 3441.008 | 0.000 | 0.000 | 0.000 | 3442.937 | 0.000 | 0.000 | 0.000 |
|   | 3444.865 | 0.000 | 0.000 | 0.000 | 3446.794 | 0.000 | 0.000 | 0.000 | 3448.723 | 0.000 | 0.000 | 0.000 |
|   | 3450.652 | 0.000 | 0.000 | 0.000 | 3452.581 | 0.000 | 0.000 | 0.000 | 3454.509 | 0.000 | 0.000 | 0.000 |
|   | 3456.438 | 0.000 | 0.000 | 0.000 | 3458.367 | 0.000 | 0.000 | 0.000 | 3460.296 | 0.000 | 0.000 | 0.000 |
|   | 3462.225 | 0.000 | 0.000 | 0.000 | 3464.154 | 0.000 | 0.000 | 0.000 | 3466.082 | 0.000 | 0.000 | 0.000 |
|   | 3468.011 | 0.000 | 0.000 | 0.000 | 3469.940 | 0.000 | 0.000 | 0.000 | 3471.869 | 0.000 | 0.000 | 0.000 |
|   | 3473.798 | 0.000 | 0.000 | 0.000 | 3475.726 | 0.000 | 0.000 | 0.000 | 3477.655 | 0.000 | 0.000 | 0.000 |
|   | 3479.584 | 0.000 | 0.000 | 0.000 | 3481.513 | 0.000 | 0.000 | 0.000 | 3483.442 | 0.000 | 0.000 | 0.000 |
|   | 3485.371 | 0.000 | 0.000 | 0.000 | 3487.299 | 0.000 | 0.000 | 0.000 | 3489.228 | 0.000 | 0.000 | 0.000 |
|   | 3491.157 | 0.000 | 0.000 | 0.000 | 3493.086 | 0.000 | 0.000 | 0.000 | 3495.015 | 0.000 | 0.000 | 0.000 |
|   | 3496.943 | 0.000 | 0.000 | 0.000 | 3498.872 | 0.000 | 0.000 | 0.000 | 3500.801 | 0.000 | 0.000 | 0.000 |
|   | 3502.730 | 0.000 | 0.000 | 0.000 | 3504.659 | 0.000 | 0.000 | 0.000 | 3506.587 | 0.000 | 0.000 | 0.000 |
|   | 3508.516 | 0.000 | 0.000 | 0.000 | 3510.445 | 0.000 | 0.000 | 0.000 | 3512.374 | 0.000 | 0.000 | 0.000 |
|   | 3514.303 | 0.000 | 0.000 | 0.000 | 3516.232 | 0.000 | 0.000 | 0.000 | 3518.160 | 0.000 | 0.000 | 0.000 |
|   | 1062.778 | 0.000 | 0.000 | 0.000 | 1064.706 | 0.000 | 0.000 | 0.000 | 1066.635 | 0.000 | 0.000 | 0.000 |
|   | 1068.564 | 0.000 | 0.000 | 0.000 | 1070.493 | 0.000 | 0.000 | 0.000 | 1072.422 | 0.000 | 0.000 | 0.000 |
|   | 1074.351 | 0.000 | 0.000 | 0.000 | 1076.279 | 0.000 | 0.000 | 0.000 | 1078.208 | 0.000 | 0.000 | 0.000 |
|   | 1080.137 | 0.000 | 0.000 | 0.000 | 1082.066 | 0.000 | 0.000 | 0.000 | 1083.995 | 0.000 | 0.000 | 0.000 |
|   | 1085.923 | 0.000 | 0.000 | 0.000 | 1087.852 | 0.000 | 0.000 | 0.000 | 1089.781 | 0.000 | 0.000 | 0.000 |
|   | 1091.710 | 0.000 | 0.000 | 0.000 | 1093.639 | 0.000 | 0.000 | 0.000 | 1095.567 | 0.000 | 0.000 | 0.000 |
|   | 1097.496 | 0.000 | 0.000 | 0.000 | 1099.425 | 0.000 | 0.000 | 0.000 | 1101.354 | 0.000 | 0.000 | 0.000 |
|   | 1103.283 | 0.000 | 0.000 | 0.000 | 1105.212 | 0.000 | 0.000 | 0.000 | 1107.140 | 0.000 | 0.000 | 0.000 |
|   | 1109.069 | 0.000 | 0.000 | 0.000 | 1110.998 | 0.000 | 0.000 | 0.000 | 1112.927 | 0.000 | 0.000 | 0.000 |
|   | 1114.856 | 0.000 | 0.000 | 0.000 | 1116.784 | 0.000 | 0.000 | 0.000 | 1118.713 | 0.000 | 0.000 | 0.000 |
|   | 1120.642 | 0.000 | 0.000 | 0.000 | 1122.571 | 0.000 | 0.000 | 0.000 | 1124.500 | 0.000 | 0.000 | 0.000 |
|   | 1126.429 | 0.000 | 0.000 | 0.000 | 1128.357 | 0.000 | 0.000 | 0.000 | 1130.286 | 0.000 | 0.000 | 0.000 |
| 4 | 1132.215 | 0.000 | 0.000 | 0.000 | 1134.144 | 0.000 | 0.000 | 0.000 | 1136.073 | 0.000 | 0.000 | 0.000 |
|   | 1138.001 | 0.000 | 0.000 | 0.000 | 1139.930 | 0.000 | 0.000 | 0.000 | 1141.859 | 0.000 | 0.000 | 0.000 |
|   | 1143.788 | 0.000 | 0.000 | 0.000 | 1145.717 | 0.000 | 0.000 | 0.000 | 1147.646 | 0.000 | 0.000 | 0.000 |
|   | 1149.574 | 0.000 | 0.000 | 0.000 | 1151.503 | 0.000 | 0.000 | 0.000 | 1153.432 | 0.000 | 0.000 | 0.000 |
|   | 1155.361 | 0.000 | 0.000 | 0.000 | 1157.290 | 0.000 | 0.000 | 0.000 | 1159.218 | 0.000 | 0.000 | 0.000 |
|   | 1161.147 | 0.000 | 0.000 | 0.000 | 1163.076 | 0.000 | 0.000 | 0.000 | 1165.005 | 0.000 | 0.000 | 0.000 |
|   | 1166.934 | 0.000 | 0.000 | 0.000 | 1168.862 | 0.000 | 0.000 | 0.000 | 1170.791 | 0.000 | 0.000 | 0.000 |
|   | 1172.720 | 0.000 | 0.000 | 0.000 | 1174.649 | 0.000 | 0.000 | 0.000 | 1176.578 | 0.000 | 0.000 | 0.000 |
|   | 1178.507 | 0.000 | 0.000 | 0.000 | 1180.435 | 0.000 | 0.000 | 0.000 | 1182.364 | 0.000 | 0.000 | 0.000 |
|   | 1184.293 | 0.000 | 0.000 | 0.000 | 1186.222 | 0.000 | 0.000 | 0.000 | 1188.151 | 0.000 | 0.000 | 0.000 |
|   | 1190.079 | 0.000 | 0.000 | 0.000 | 1192.008 | 0.000 | 0.000 | 0.000 | 1193.937 | 0.000 | 0.000 | 0.000 |
|   | 1195.866 | 0.000 | 0.000 | 0.000 | 1197.795 | 0.000 | 0.000 | 0.000 | 1199.724 | 0.000 | 0.000 | 0.000 |
|   | 1201.652 | 0.000 | 0.000 | 0.000 | 1203.581 | 0.000 | 0.000 | 0.000 | 1205.510 | 0.000 | 0.000 | 0.000 |
|   | 1207.439 | 0.000 | 0.000 | 0.000 | 1209.368 | 0.000 | 0.000 | 0.000 | 1211.296 | 0.000 | 0.000 | 0.000 |
|   | 1213.225 | 0.000 | 0.000 | 0.000 |          |       |       |       |          |       |       |       |
|   | 1161.147 | 0.000 | 0.000 | 0.000 | 1163.076 | 0.000 | 0.000 | 0.000 | 1165.005 | 0.000 | 0.000 | 0.000 |
|   | 1166.934 | 0.000 | 0.000 | 0.000 | 1168.862 | 0.000 | 0.000 | 0.000 | 1170.791 | 0.000 | 0.000 | 0.000 |
|   | 1172.720 | 0.000 | 0.000 | 0.000 | 1174.649 | 0.000 | 0.000 | 0.000 | 1176.578 | 0.000 | 0.000 | 0.000 |
|   | 1178.507 | 0.000 | 0.000 | 0.000 | 1180.435 | 0.000 | 0.000 | 0.000 | 1182.364 | 0.000 | 0.000 | 0.000 |
|   | 1184.293 | 0.000 | 0.000 | 0.000 | 1186.222 | 0.000 | 0.000 | 0.000 | 1188.151 | 0.000 | 0.000 | 0.000 |
|   | 1190.079 | 0.000 | 0.000 | 0.000 | 1192.008 | 0.000 | 0.000 | 0.000 | 1193.937 | 0.000 | 0.000 | 0.000 |
|   | 1195.866 | 0.000 | 0.000 | 0.000 | 1197.795 | 0.000 | 0.000 | 0.000 | 1199.724 | 0.000 | 0.000 | 0.000 |
|   | 1201.652 | 0.000 | 0.000 | 0.000 | 1203.581 | 0.000 | 0.000 | 0.000 | 1205.510 | 0.000 | 0.000 | 0.000 |
|   | 1207.439 | 0.000 | 0.000 | 0.000 | 1209.368 | 0.000 | 0.000 | 0.000 | 1211.296 | 0.000 | 0.000 | 0.000 |
|   | 1213.225 | 0.000 | 0.000 | 0.000 | 1215.154 | 0.000 | 0.000 | 0.000 | 1217.083 | 0.000 | 0.000 | 0.000 |
|   | 1219.012 | 0.000 | 0.000 | 0.000 | 1220.941 | 0.000 | 0.000 | 0.000 | 1222.869 | 0.000 | 0.000 | 0.000 |
|   | 1224.798 | 0.000 | 0.000 | 0.000 | 1226.727 | 0.000 | 0.000 | 0.000 | 1228.656 | 0.000 | 0.000 | 0.000 |
|   | 1230.585 | 0.000 | 0.000 | 0.000 | 1232.513 | 0.000 | 0.000 | 0.000 | 1234.442 | 0.000 | 0.000 | 0.000 |
|   | 1236.371 | 0.000 | 0.000 | 0.000 | 1238.300 | 0.000 | 0.000 | 0.000 | 1240.229 | 0.000 | 0.000 | 0.000 |
| 5 | 1242.158 | 0.000 | 0.000 | 0.000 | 1244.086 | 0.000 | 0.000 | 0.000 | 1246.015 | 0.000 | 0.000 | 0.000 |
|   | 1247.944 | 0.000 | 0.000 | 0.000 | 1249.873 | 0.000 | 0.000 | 0.000 | 1251.802 | 0.000 | 0.000 | 0.000 |
|   | 1253.730 | 0.000 | 0.000 | 0.000 | 1255.659 | 0.000 | 0.000 | 0.000 | 1257.588 | 0.000 | 0.000 | 0.000 |
|   | 1259.517 | 0.000 | 0.000 | 0.000 | 1261.446 | 0.000 | 0.000 | 0.000 | 1263.374 | 0.000 | 0.000 | 0.000 |
|   | 1265.303 | 0.000 | 0.000 | 0.000 | 1267.232 |       |       |       |          |       |       |       |

**Table S2** Pairwise t-test results of wave number markers

|            |       |       |       |          |       |       |       |          |       |       |       |
|------------|-------|-------|-------|----------|-------|-------|-------|----------|-------|-------|-------|
| 1328.954   | 0.000 | 0.000 | 0.000 | 1330.883 | 0.000 | 0.000 | 0.000 | 1332.812 | 0.000 | 0.000 | 0.000 |
| 1334.741   | 0.000 | 0.000 | 0.000 | 1336.669 | 0.000 | 0.000 | 0.000 | 1338.598 | 0.000 | 0.000 | 0.000 |
| 1340.527   | 0.000 | 0.000 | 0.000 | 1342.456 | 0.000 | 0.000 | 0.000 | 1344.385 | 0.000 | 0.000 | 0.000 |
| 1346.314   | 0.000 | 0.000 | 0.000 | 1348.242 | 0.000 | 0.000 | 0.000 | 1350.171 | 0.000 | 0.000 | 0.000 |
| 1352.100   | 0.000 | 0.000 | 0.000 | 1354.029 | 0.000 | 0.000 | 0.000 | 1355.958 | 0.000 | 0.000 | 0.000 |
| 1357.886   | 0.000 | 0.000 | 0.000 | 1359.815 | 0.000 | 0.000 | 0.000 | 1361.744 | 0.000 | 0.000 | 0.000 |
| 1363.673   | 0.000 | 0.000 | 0.000 | 1365.602 | 0.000 | 0.000 | 0.000 | 1367.531 | 0.000 | 0.000 | 0.000 |
| 1369.459   | 0.000 | 0.000 | 0.000 | 1371.388 | 0.000 | 0.000 | 0.000 | 1373.317 | 0.000 | 0.000 | 0.000 |
| 1375.246   | 0.000 | 0.000 | 0.000 | 1377.175 | 0.000 | 0.000 | 0.000 | 1379.103 | 0.000 | 0.000 | 0.000 |
| 1381.032   | 0.000 | 0.000 | 0.000 | 1382.961 | 0.000 | 0.000 | 0.000 | 1384.890 | 0.000 | 0.000 | 0.000 |
| 1386.819   | 0.000 | 0.000 | 0.000 |          |       |       |       |          |       |       |       |
| 3348.425   | 0.000 | 0.000 | 0.000 | 3350.353 | 0.000 | 0.000 | 0.000 | 3352.282 | 0.000 | 0.000 | 0.000 |
| 3354.211   | 0.000 | 0.000 | 0.000 | 3356.140 | 0.000 | 0.000 | 0.000 | 3358.069 | 0.000 | 0.000 | 0.000 |
| 3359.997   | 0.000 | 0.000 | 0.000 | 3361.926 | 0.000 | 0.000 | 0.000 | 3363.855 | 0.000 | 0.000 | 0.000 |
| 3365.784   | 0.000 | 0.000 | 0.000 | 3367.713 | 0.000 | 0.000 | 0.000 | 3369.642 | 0.000 | 0.000 | 0.000 |
| 3371.570   | 0.000 | 0.000 | 0.000 | 3373.499 | 0.000 | 0.000 | 0.000 | 3375.428 | 0.000 | 0.000 | 0.000 |
| 3377.357   | 0.000 | 0.000 | 0.000 | 3379.286 | 0.000 | 0.000 | 0.000 | 3381.214 | 0.000 | 0.000 | 0.000 |
| 3383.143   | 0.000 | 0.000 | 0.000 | 3385.072 | 0.000 | 0.000 | 0.000 | 3387.001 | 0.000 | 0.000 | 0.000 |
| 3388.930   | 0.000 | 0.000 | 0.000 | 3390.859 | 0.000 | 0.000 | 0.000 | 3392.787 | 0.000 | 0.000 | 0.000 |
| 3394.716   | 0.000 | 0.000 | 0.000 | 3396.645 | 0.000 | 0.000 | 0.000 | 3398.574 | 0.000 | 0.000 | 0.000 |
| 3400.503   | 0.000 | 0.000 | 0.000 | 3402.431 | 0.000 | 0.000 | 0.000 | 3404.360 | 0.000 | 0.000 | 0.000 |
| 3406.289   | 0.000 | 0.000 | 0.000 | 3408.218 | 0.000 | 0.000 | 0.000 | 3410.147 | 0.000 | 0.000 | 0.000 |
| 3412.076   | 0.000 | 0.000 | 0.000 | 3414.004 | 0.000 | 0.000 | 0.000 | 3415.933 | 0.000 | 0.000 | 0.000 |
| 3417.862   | 0.000 | 0.000 | 0.000 | 3419.791 | 0.000 | 0.000 | 0.000 | 3421.720 | 0.000 | 0.000 | 0.000 |
| 3423.648   | 0.000 | 0.000 | 0.000 | 3425.577 | 0.000 | 0.000 | 0.000 | 3427.506 | 0.000 | 0.000 | 0.000 |
| 3429.435   | 0.000 | 0.000 | 0.000 | 3431.364 | 0.000 | 0.000 | 0.000 | 3433.292 | 0.000 | 0.000 | 0.000 |
| 3435.221   | 0.000 | 0.000 | 0.000 | 3437.150 | 0.000 | 0.000 | 0.000 | 3439.079 | 0.000 | 0.000 | 0.000 |
| 3441.008   | 0.000 | 0.000 | 0.000 | 3442.937 | 0.000 | 0.000 | 0.000 | 3444.865 | 0.000 | 0.000 | 0.000 |
| 3446.794   | 0.000 | 0.000 | 0.000 | 3448.723 | 0.000 | 0.000 | 0.000 | 3450.652 | 0.000 | 0.000 | 0.000 |
| 6 3452.581 | 0.000 | 0.000 | 0.000 | 3454.509 | 0.000 | 0.000 | 0.000 | 3456.438 | 0.000 | 0.000 | 0.000 |
| 3458.367   | 0.000 | 0.000 | 0.000 | 3460.296 | 0.000 | 0.000 | 0.000 | 3462.225 | 0.000 | 0.000 | 0.000 |
| 3464.154   | 0.000 | 0.000 | 0.000 | 3466.082 | 0.000 | 0.000 | 0.000 | 3468.011 | 0.000 | 0.000 | 0.000 |
| 3469.940   | 0.000 | 0.000 | 0.000 | 3471.869 | 0.000 | 0.000 | 0.000 | 3473.798 | 0.000 | 0.000 | 0.000 |
| 3475.726   | 0.000 | 0.000 | 0.000 | 3477.655 | 0.000 | 0.000 | 0.000 | 3479.584 | 0.000 | 0.000 | 0.000 |
| 3481.513   | 0.000 | 0.000 | 0.000 | 3483.442 | 0.000 | 0.000 | 0.000 | 3485.371 | 0.000 | 0.000 | 0.000 |
| 3487.299   | 0.000 | 0.000 | 0.000 | 3489.228 | 0.000 | 0.000 | 0.000 | 3491.157 | 0.000 | 0.000 | 0.000 |
| 3493.086   | 0.000 | 0.000 | 0.000 | 3495.015 | 0.000 | 0.000 | 0.000 | 3496.943 | 0.000 | 0.000 | 0.000 |
| 3498.872   | 0.000 | 0.000 | 0.000 | 3500.801 | 0.000 | 0.000 | 0.000 | 3502.730 | 0.000 | 0.000 | 0.000 |
| 3504.659   | 0.000 | 0.000 | 0.000 | 3506.587 | 0.000 | 0.000 | 0.000 | 3508.516 | 0.000 | 0.000 | 0.000 |
| 3510.445   | 0.000 | 0.000 | 0.000 | 3512.374 | 0.000 | 0.000 | 0.000 | 3514.303 | 0.000 | 0.000 | 0.000 |
| 3516.232   | 0.000 | 0.000 | 0.000 | 3518.160 | 0.000 | 0.000 | 0.000 | 3520.089 | 0.000 | 0.000 | 0.000 |
| 3522.018   | 0.000 | 0.000 | 0.000 | 3523.947 | 0.000 | 0.000 | 0.000 | 3525.876 | 0.000 | 0.000 | 0.000 |
| 3527.804   | 0.000 | 0.000 | 0.000 | 3529.733 | 0.000 | 0.000 | 0.000 | 3531.662 | 0.000 | 0.000 | 0.000 |
| 3533.591   | 0.000 | 0.000 | 0.000 | 3535.520 | 0.000 | 0.000 | 0.000 | 3537.449 | 0.000 | 0.000 | 0.000 |
| 3539.377   | 0.000 | 0.000 | 0.000 | 3541.306 | 0.000 | 0.000 | 0.000 | 3543.235 | 0.000 | 0.000 | 0.000 |
| 3545.164   | 0.000 | 0.000 | 0.000 | 3547.093 | 0.000 | 0.000 | 0.000 | 3549.021 | 0.000 | 0.000 | 0.000 |
| 3550.950   | 0.000 | 0.000 | 0.000 | 3552.879 | 0.000 | 0.000 | 0.000 | 3554.808 | 0.000 | 0.000 | 0.000 |
| 3556.737   | 0.000 | 0.000 | 0.000 | 3558.666 | 0.000 | 0.000 | 0.000 | 3560.594 | 0.000 | 0.000 | 0.000 |
| 3115.038   | 0.000 | 0.000 | 0.000 | 3116.967 | 0.000 | 0.000 | 0.000 | 3118.895 | 0.000 | 0.000 | 0.000 |
| 3120.824   | 0.000 | 0.000 | 0.000 | 3122.753 | 0.000 | 0.000 | 0.000 | 3124.682 | 0.000 | 0.000 | 0.000 |
| 3126.611   | 0.000 | 0.000 | 0.000 | 3128.540 | 0.000 | 0.000 | 0.000 | 3130.468 | 0.000 | 0.000 | 0.000 |
| 3132.397   | 0.000 | 0.000 | 0.000 | 3134.326 | 0.000 | 0.000 | 0.000 | 3136.255 | 0.000 | 0.000 | 0.000 |
| 3138.184   | 0.000 | 0.000 | 0.000 | 3140.112 | 0.000 | 0.000 | 0.000 | 3142.041 | 0.000 | 0.000 | 0.000 |
| 3143.970   | 0.000 | 0.000 | 0.000 | 3145.899 | 0.000 | 0.000 | 0.000 | 3147.828 | 0.000 | 0.000 | 0.000 |
| 3149.757   | 0.000 | 0.000 | 0.000 | 3151.685 | 0.000 | 0.000 | 0.000 | 3153.614 | 0.000 | 0.000 | 0.000 |
| 3155.543   | 0.000 | 0.000 | 0.000 | 3157.472 | 0.000 | 0.000 | 0.000 | 3159.401 | 0.000 | 0.000 | 0.000 |
| 3161.329   | 0.000 | 0.000 | 0.000 | 3163.258 | 0.000 | 0.000 | 0.000 | 3165.187 | 0.000 | 0.000 | 0.000 |
| 3167.116   | 0.000 | 0.000 | 0.000 | 3169.045 | 0.000 | 0.000 | 0.000 | 3170.974 | 0.000 | 0.000 | 0.000 |
| 3172.902   | 0.000 | 0.000 | 0.000 | 3174.831 | 0.000 | 0.000 | 0.000 | 3176.760 | 0.000 | 0.000 | 0.000 |
| 3178.689   | 0.000 | 0.000 | 0.000 | 3180.618 | 0.000 | 0.000 | 0.000 | 3182.546 | 0.000 | 0.000 | 0.000 |
| 3184.475   | 0.000 | 0.000 | 0.000 | 3186.404 | 0.000 | 0.000 | 0.000 | 3188.333 | 0.000 | 0.000 | 0.000 |
| 3190.262   | 0.000 | 0.000 | 0.000 | 3192.190 | 0.000 | 0.000 | 0.000 | 3194.119 | 0.000 | 0.000 | 0.000 |
| 3196.048   | 0.000 | 0.000 | 0.000 | 3197.977 | 0.000 | 0.000 | 0.000 | 3199.906 | 0.000 | 0.000 | 0.000 |
| 3201.835   | 0.000 | 0.000 | 0.000 | 3203.763 | 0.000 | 0.000 | 0.000 | 3205.692 | 0.000 | 0.000 | 0.000 |
| 3207.621   | 0.000 | 0.000 | 0.000 | 3209.550 | 0.000 | 0.000 | 0.000 | 3211.479 | 0.000 | 0.000 | 0.000 |
| 3213.407   | 0.000 | 0.000 | 0.000 | 3215.336 | 0.000 | 0.000 | 0.000 | 3217.265 | 0.000 | 0.000 | 0.000 |
| 3219.194   | 0.000 | 0.000 | 0.000 | 3221.123 | 0.000 | 0.000 | 0.000 | 3223.052 | 0.000 | 0.000 | 0.000 |
| 3224.980   | 0.000 | 0.000 | 0.000 | 3226.909 | 0.000 | 0.000 | 0.000 | 3228.838 | 0.000 | 0.000 | 0.000 |
| 3230.767   | 0.000 | 0.000 | 0.000 | 3232.696 | 0.000 | 0.000 | 0.000 | 3234.624 | 0.000 | 0.000 | 0.000 |
| 3236.553   | 0.000 | 0.000 | 0.000 | 3238.482 | 0.000 | 0.000 | 0.000 | 3240.411 | 0.000 | 0.000 | 0.000 |
| 3242.340   | 0.000 | 0.000 | 0.000 | 3244.269 | 0.000 | 0.000 | 0.000 | 3246.197 | 0.000 | 0.000 | 0.000 |
| 3248.126   | 0.000 | 0.000 | 0.000 | 3250.055 | 0.000 | 0.000 | 0.000 | 3251.984 | 0.000 | 0.000 | 0.000 |
| 3253.913   | 0.000 | 0.000 | 0.000 | 3255.841 | 0.000 | 0.000 | 0.000 | 3257.770 | 0.000 | 0.000 | 0.000 |
| 3259.699   | 0.000 | 0.000 | 0.000 | 3261.628 | 0.000 | 0.000 | 0.000 | 3263.557 | 0.000 | 0.000 | 0.000 |
| 3265.485   | 0.000 | 0.000 | 0.000 | 3267.414 | 0.000 | 0.000 | 0.000 | 3269.343 | 0.000 | 0.000 | 0.000 |
| 3271.272   | 0.000 | 0.000 | 0.000 | 3273.201 | 0.000 | 0.000 | 0.000 | 3275.130 | 0.000 | 0.000 | 0.000 |
| 3277.058   | 0.000 | 0.000 | 0.000 | 3278.987 | 0.000 | 0.000 | 0.000 | 3280.916 | 0.000 | 0.000 | 0.000 |
| 3282.845   | 0.000 | 0.000 | 0.000 | 3284.774 | 0.000 | 0.000 | 0.000 | 3286.702 | 0.000 | 0.000 | 0.000 |
| 3288.631   | 0.000 | 0.000 | 0.000 | 3290.560 | 0.000 | 0.000 | 0.000 | 3292.489 | 0.000 | 0.000 | 0.000 |
| 3294.418   | 0.000 | 0.000 | 0.000 | 3296.347 | 0.000 | 0.000 | 0.000 | 3298.275 | 0.000 | 0.000 | 0.000 |
| 3300.204   | 0.000 | 0.000 | 0.000 | 3302.133 | 0.000 | 0.000 | 0.000 | 3304.062 | 0.000 | 0.000 | 0.000 |
| 3305.991   | 0.000 | 0.000 | 0.000 | 3307.919 | 0.000 | 0.000 | 0.000 | 3309.848 | 0.000 | 0.000 | 0.000 |
| 3311.777   | 0.000 | 0.000 | 0.000 | 3313.706 | 0.000 | 0.000 | 0.000 | 3315.635 | 0.000 | 0.000 | 0.000 |
| 3317.564   | 0.000 | 0.000 | 0.000 | 3319.492 | 0.000 | 0.000 | 0.000 | 3321.421 | 0.000 | 0.000 | 0.000 |
| 3323.350   | 0.000 | 0.000 | 0.000 | 3325.279 | 0.000 | 0.000 | 0.000 | 3327.208 | 0.000 | 0.000 | 0.000 |
| 3329.136   | 0.000 | 0.000 | 0.000 | 3331.065 | 0.000 | 0.000 | 0.000 | 3332.994 | 0.000 | 0.000 | 0.000 |
| 3334.923   | 0.000 | 0.000 | 0.000 | 3336.852 | 0.000 | 0.000 | 0.000 | 3338.780 | 0.000 | 0.000 | 0.000 |
| 3340.709   | 0.000 | 0.000 | 0.000 | 3342.638 | 0.000 | 0.000 | 0.000 | 3344.567 | 0.000 | 0.000 | 0.000 |
| 3346.496   | 0.000 | 0.000 | 0.000 | 3348.425 | 0.000 | 0.000 | 0.000 | 3350.353 | 0.000 | 0.000 | 0.000 |
| 3352.282   | 0.000 | 0.000 | 0.000 | 3354.211 | 0.000 | 0.000 | 0.000 | 3356.140 | 0.000 | 0.000 | 0.000 |
| 3358.069   | 0.000 | 0.000 | 0.000 | 3359.997 | 0.000 | 0.000 | 0.000 | 3361.926 | 0.000 | 0.000 | 0.000 |
| 3363.855   | 0.000 | 0.000 | 0.000 | 3365.784 | 0.000 | 0.000 | 0.000 | 3367.713 | 0.000 | 0.000 | 0.000 |
| 3369.642   | 0.    |       |       |          |       |       |       |          |       |       |       |

**Table S2** Pairwise t-test results of wave number markers

|            |       |       |       |          |       |       |       |          |       |       |       |
|------------|-------|-------|-------|----------|-------|-------|-------|----------|-------|-------|-------|
| 3415.933   | 0.000 | 0.000 | 0.000 | 3417.862 | 0.000 | 0.000 | 0.000 | 3419.791 | 0.000 | 0.000 | 0.000 |
| 3421.720   | 0.000 | 0.000 | 0.000 | 3423.648 | 0.000 | 0.000 | 0.000 | 3425.577 | 0.000 | 0.000 | 0.000 |
| 3427.506   | 0.000 | 0.000 | 0.000 | 3429.435 | 0.000 | 0.000 | 0.000 | 3431.364 | 0.000 | 0.000 | 0.000 |
| 3433.292   | 0.000 | 0.000 | 0.000 | 3435.221 | 0.000 | 0.000 | 0.000 | 3437.150 | 0.000 | 0.000 | 0.000 |
| 3439.079   | 0.000 | 0.000 | 0.000 | 3441.008 | 0.000 | 0.000 | 0.000 | 3442.937 | 0.000 | 0.000 | 0.000 |
| 3444.865   | 0.000 | 0.000 | 0.000 | 3446.794 | 0.000 | 0.000 | 0.000 | 3448.723 | 0.000 | 0.000 | 0.000 |
| 3450.652   | 0.000 | 0.000 | 0.000 | 3452.581 | 0.000 | 0.000 | 0.000 | 3454.509 | 0.000 | 0.000 | 0.000 |
| 3456.438   | 0.000 | 0.000 | 0.000 | 3458.367 | 0.000 | 0.000 | 0.000 | 3460.296 | 0.000 | 0.000 | 0.000 |
| 3462.225   | 0.000 | 0.000 | 0.000 | 3464.154 | 0.000 | 0.000 | 0.000 | 3466.082 | 0.000 | 0.000 | 0.000 |
| 3468.011   | 0.000 | 0.000 | 0.000 | 3469.940 | 0.000 | 0.000 | 0.000 | 3471.869 | 0.000 | 0.000 | 0.000 |
| 3473.798   | 0.000 | 0.000 | 0.000 | 3475.726 | 0.000 | 0.000 | 0.000 | 3477.655 | 0.000 | 0.000 | 0.000 |
| 3479.584   | 0.000 | 0.000 | 0.000 | 3481.513 | 0.000 | 0.000 | 0.000 | 3483.442 | 0.000 | 0.000 | 0.000 |
| 3485.371   | 0.000 | 0.000 | 0.000 | 3487.299 | 0.000 | 0.000 | 0.000 | 3489.228 | 0.000 | 0.000 | 0.000 |
| 3491.157   | 0.000 | 0.000 | 0.000 | 3493.086 | 0.000 | 0.000 | 0.000 | 3495.015 | 0.000 | 0.000 | 0.000 |
| 3496.943   | 0.000 | 0.000 | 0.000 | 3498.872 | 0.000 | 0.000 | 0.000 | 3500.801 | 0.000 | 0.000 | 0.000 |
| 3502.730   | 0.000 | 0.000 | 0.000 | 3504.659 | 0.000 | 0.000 | 0.000 | 3506.587 | 0.000 | 0.000 | 0.000 |
| 3508.516   | 0.000 | 0.000 | 0.000 | 3510.445 | 0.000 | 0.000 | 0.000 | 3512.374 | 0.000 | 0.000 | 0.000 |
| 3514.303   | 0.000 | 0.000 | 0.000 | 3516.232 | 0.000 | 0.000 | 0.000 | 3518.160 | 0.000 | 0.000 | 0.000 |
| 3520.089   | 0.000 | 0.000 | 0.000 | 3522.018 | 0.000 | 0.000 | 0.000 | 3523.947 | 0.000 | 0.000 | 0.000 |
| 3525.876   | 0.000 | 0.000 | 0.000 | 3527.804 | 0.000 | 0.000 | 0.000 | 3529.733 | 0.000 | 0.000 | 0.000 |
| 3531.662   | 0.000 | 0.000 | 0.000 | 3533.591 | 0.000 | 0.000 | 0.000 | 3535.520 | 0.000 | 0.000 | 0.000 |
| 3537.449   | 0.000 | 0.000 | 0.000 | 3539.377 | 0.000 | 0.000 | 0.000 | 3541.306 | 0.000 | 0.000 | 0.000 |
| 3543.235   | 0.000 | 0.000 | 0.000 | 3545.164 | 0.000 | 0.000 | 0.000 | 3547.093 | 0.000 | 0.000 | 0.000 |
| 3549.021   | 0.000 | 0.000 | 0.000 | 3550.950 | 0.000 | 0.000 | 0.000 | 3552.879 | 0.000 | 0.000 | 0.000 |
| 3554.808   | 0.000 | 0.000 | 0.000 | 3556.737 | 0.000 | 0.000 | 0.000 | 3558.666 | 0.000 | 0.000 | 0.000 |
| 3560.594   | 0.000 | 0.000 | 0.000 | 3562.523 | 0.000 | 0.000 | 0.000 | 3564.452 | 0.000 | 0.000 | 0.000 |
| 3566.381   | 0.000 | 0.000 | 0.000 | 3568.31  | 0.000 | 0.000 | 0.000 | 3570.238 | 0.000 | 0.000 | 0.000 |
| 3572.167   | 0.000 | 0.000 | 0.000 | 3574.096 | 0.000 | 0.000 | 0.000 | 3576.025 | 0.000 | 0.000 | 0.000 |
| 3577.954   | 0.000 | 0.000 | 0.000 | 3579.882 | 0.000 | 0.000 | 0.000 | 3581.811 | 0.000 | 0.000 | 0.000 |
| 3583.740   | 0.000 | 0.000 | 0.000 | 3585.669 | 0.000 | 0.000 | 0.000 | 3587.598 | 0.000 | 0.000 | 0.000 |
| 3589.527   | 0.000 | 0.000 | 0.000 | 3591.455 | 0.000 | 0.000 | 0.000 | 3593.384 | 0.000 | 0.000 | 0.000 |
| 3595.313   | 0.000 | 0.000 | 0.000 | 3597.242 | 0.000 | 0.000 | 0.000 | 3599.171 | 0.000 | 0.000 | 0.000 |
| 3601.099   | 0.000 | 0.000 | 0.000 | 3603.028 | 0.000 | 0.000 | 0.000 | 3604.957 | 0.000 | 0.000 | 0.000 |
| 3606.886   | 0.000 | 0.000 | 0.000 | 3608.815 | 0.000 | 0.000 | 0.000 | 3610.744 | 0.000 | 0.000 | 0.000 |
| 3612.672   | 0.000 | 0.000 | 0.000 | 3614.601 | 0.000 | 0.000 | 0.000 | 3616.530 | 0.000 | 0.000 | 0.000 |
| 3618.459   | 0.000 | 0.000 | 0.000 | 3620.388 | 0.000 | 0.000 | 0.000 | 3622.316 | 0.000 | 0.000 | 0.000 |
| 3624.245   | 0.000 | 0.000 | 0.000 |          |       |       |       |          |       |       |       |
| 2567.254   | 0.000 | 0.000 | 0.000 | 2569.183 | 0.000 | 0.000 | 0.000 | 2571.112 | 0.000 | 0.000 | 0.000 |
| 2573.041   | 0.000 | 0.000 | 0.000 | 2574.969 | 0.000 | 0.000 | 0.000 | 2576.898 | 0.000 | 0.000 | 0.000 |
| 2578.827   | 0.000 | 0.000 | 0.000 | 2580.756 | 0.000 | 0.000 | 0.000 | 2582.685 | 0.000 | 0.000 | 0.000 |
| 2584.613   | 0.000 | 0.000 | 0.000 | 2586.542 | 0.000 | 0.000 | 0.000 | 2588.471 | 0.000 | 0.000 | 0.000 |
| 2590.400   | 0.000 | 0.000 | 0.000 | 2592.329 | 0.000 | 0.000 | 0.000 | 2594.258 | 0.000 | 0.000 | 0.000 |
| 2596.186   | 0.000 | 0.000 | 0.000 | 2598.115 | 0.000 | 0.000 | 0.000 | 2600.044 | 0.000 | 0.000 | 0.000 |
| 2601.973   | 0.000 | 0.000 | 0.000 | 2603.902 | 0.000 | 0.000 | 0.000 | 2605.830 | 0.000 | 0.000 | 0.000 |
| 2607.759   | 0.000 | 0.000 | 0.000 | 2609.688 | 0.000 | 0.000 | 0.000 | 2611.617 | 0.000 | 0.000 | 0.000 |
| 2613.546   | 0.000 | 0.000 | 0.000 | 2615.474 | 0.000 | 0.000 | 0.000 | 2617.403 | 0.000 | 0.000 | 0.000 |
| 2619.332   | 0.000 | 0.000 | 0.000 | 2621.261 | 0.000 | 0.000 | 0.000 | 2623.190 | 0.000 | 0.000 | 0.000 |
| 2625.119   | 0.000 | 0.000 | 0.000 | 2627.047 | 0.000 | 0.000 | 0.000 | 2628.976 | 0.000 | 0.000 | 0.000 |
| 2630.905   | 0.000 | 0.000 | 0.000 | 2632.834 | 0.000 | 0.000 | 0.000 | 2634.763 | 0.000 | 0.000 | 0.000 |
| 2636.691   | 0.000 | 0.000 | 0.000 | 2638.620 | 0.000 | 0.000 | 0.000 | 2640.549 | 0.000 | 0.000 | 0.000 |
| 2642.478   | 0.000 | 0.000 | 0.000 | 2644.407 | 0.000 | 0.000 | 0.000 | 2646.336 | 0.000 | 0.000 | 0.000 |
| 2648.264   | 0.000 | 0.000 | 0.000 | 2650.193 | 0.000 | 0.000 | 0.000 | 2652.122 | 0.000 | 0.000 | 0.000 |
| 2654.051   | 0.000 | 0.000 | 0.000 | 2655.980 | 0.000 | 0.000 | 0.000 | 2657.908 | 0.000 | 0.000 | 0.000 |
| 2659.837   | 0.000 | 0.000 | 0.000 | 2661.766 | 0.000 | 0.000 | 0.000 | 2663.695 | 0.000 | 0.000 | 0.000 |
| 2665.624   | 0.000 | 0.000 | 0.000 | 2667.553 | 0.000 | 0.000 | 0.000 | 2669.481 | 0.000 | 0.000 | 0.000 |
| 2671.410   | 0.000 | 0.000 | 0.000 | 2673.339 | 0.000 | 0.000 | 0.000 | 2675.268 | 0.000 | 0.000 | 0.000 |
| 2677.197   | 0.000 | 0.000 | 0.000 | 2679.125 | 0.000 | 0.000 | 0.000 | 2681.054 | 0.000 | 0.000 | 0.000 |
| 2682.983   | 0.000 | 0.000 | 0.000 | 2684.912 | 0.000 | 0.000 | 0.000 | 2686.841 | 0.000 | 0.000 | 0.000 |
| 2688.770   | 0.000 | 0.000 | 0.000 | 2690.698 | 0.000 | 0.000 | 0.000 | 2692.627 | 0.000 | 0.000 | 0.000 |
| 2694.556   | 0.000 | 0.000 | 0.000 | 2696.485 | 0.000 | 0.000 | 0.000 | 2698.414 | 0.000 | 0.000 | 0.000 |
| 2700.342   | 0.000 | 0.000 | 0.000 | 2702.271 | 0.000 | 0.000 | 0.000 | 2704.200 | 0.000 | 0.000 | 0.000 |
| 2706.129   | 0.000 | 0.000 | 0.000 | 2708.058 | 0.000 | 0.000 | 0.000 | 2709.986 | 0.000 | 0.000 | 0.000 |
| 2711.915   | 0.000 | 0.000 | 0.000 | 2713.844 | 0.000 | 0.000 | 0.000 | 2715.773 | 0.000 | 0.000 | 0.000 |
| 8 2717.702 | 0.000 | 0.000 | 0.000 | 2719.631 | 0.000 | 0.000 | 0.000 | 2721.559 | 0.000 | 0.000 | 0.000 |
| 2723.488   | 0.000 | 0.000 | 0.000 | 2725.417 | 0.000 | 0.000 | 0.000 | 2727.346 | 0.000 | 0.000 | 0.000 |
| 2729.275   | 0.000 | 0.000 | 0.000 | 2731.203 | 0.000 | 0.000 | 0.000 | 2733.132 | 0.000 | 0.000 | 0.000 |
| 2735.061   | 0.000 | 0.000 | 0.000 | 2736.990 | 0.000 | 0.000 | 0.000 | 2738.919 | 0.000 | 0.000 | 0.000 |
| 2740.848   | 0.000 | 0.000 | 0.000 | 2742.776 | 0.000 | 0.000 | 0.000 | 2744.705 | 0.000 | 0.000 | 0.000 |
| 2746.634   | 0.000 | 0.000 | 0.000 | 2748.563 | 0.000 | 0.000 | 0.000 | 2750.492 | 0.000 | 0.000 | 0.000 |
| 2752.420   | 0.000 | 0.000 | 0.000 | 2754.349 | 0.000 | 0.000 | 0.000 | 2756.278 | 0.000 | 0.000 | 0.000 |
| 2758.207   | 0.000 | 0.000 | 0.000 | 2760.136 | 0.000 | 0.000 | 0.000 | 2762.065 | 0.000 | 0.000 | 0.000 |
| 2763.993   | 0.000 | 0.000 | 0.000 | 2765.922 | 0.000 | 0.000 | 0.000 | 2767.851 | 0.000 | 0.000 | 0.000 |
| 2769.780   | 0.000 | 0.000 | 0.000 | 2771.709 | 0.000 | 0.000 | 0.000 | 2773.637 | 0.000 | 0.000 | 0.000 |
| 2775.566   | 0.000 | 0.000 | 0.000 | 2777.495 | 0.000 | 0.000 | 0.000 | 2779.424 | 0.000 | 0.000 | 0.000 |
| 2781.353   | 0.000 | 0.000 | 0.000 | 2783.281 | 0.000 | 0.000 | 0.000 | 2785.210 | 0.000 | 0.000 | 0.000 |
| 2787.139   | 0.000 | 0.000 | 0.000 | 2789.068 | 0.000 | 0.000 | 0.000 | 2790.997 | 0.000 | 0.000 | 0.000 |
| 2792.926   | 0.000 | 0.000 | 0.000 | 2794.854 | 0.000 | 0.000 | 0.000 | 2796.783 | 0.000 | 0.000 | 0.000 |
| 2798.712   | 0.000 | 0.000 | 0.000 | 2800.641 | 0.000 | 0.000 | 0.000 | 2802.570 | 0.000 | 0.000 | 0.000 |
| 2804.498   | 0.000 | 0.000 | 0.000 | 2806.427 | 0.000 | 0.000 | 0.000 | 2808.356 | 0.000 | 0.000 | 0.000 |
| 2810.285   | 0.000 | 0.000 | 0.000 | 2812.214 | 0.000 | 0.000 | 0.000 | 2814.143 | 0.000 | 0.000 | 0.000 |
| 2816.071   | 0.000 | 0.000 | 0.000 | 2818.000 | 0.000 | 0.000 | 0.000 | 2819.929 | 0.000 | 0.000 | 0.000 |
| 2821.858   | 0.000 | 0.000 | 0.000 | 2823.787 | 0.000 | 0.000 | 0.000 | 2825.715 | 0.000 | 0.000 | 0.000 |
| 2827.644   | 0.000 | 0.000 | 0.000 | 2829.573 | 0.000 | 0.000 | 0.000 | 2831.502 | 0.000 | 0.000 | 0.000 |
| 2833.431   | 0.000 | 0.000 | 0.000 | 2835.360 | 0.000 | 0.000 | 0.000 | 2837.288 | 0.000 | 0.000 | 0.000 |
| 2839.217   | 0.000 | 0.000 | 0.000 | 2841.146 | 0.000 | 0.000 | 0.000 | 2843.075 | 0.000 | 0.000 | 0.000 |
| 2845.004   | 0.000 | 0.000 | 0.000 | 2846.932 | 0.000 | 0.000 | 0.000 | 2848.861 | 0.000 | 0.000 | 0.000 |
| 2850.790   | 0.000 | 0.000 | 0.000 | 2852.719 | 0.000 | 0.000 | 0.000 | 2854.648 | 0.000 | 0.000 | 0.000 |
| 2856.576   | 0.000 | 0.000 | 0.000 | 2858.505 | 0.000 | 0.000 | 0.000 | 2860.434 | 0.000 | 0.000 | 0.000 |
| 2862.363   | 0.000 | 0.000 | 0.000 | 2864.292 | 0.000 | 0.000 | 0.000 | 2866.221 | 0.000 | 0.000 | 0.000 |
| 2868.149   | 0.000 | 0.000 | 0.000 | 2870.078 | 0.000 | 0.000 | 0.000 | 2872.007 | 0.000 | 0.000 | 0.000 |
| 3334.923   | 0.000 | 0.000 | 0.000 | 3336.852 | 0.000 | 0.000 | 0.000 | 3338.780 | 0.000 | 0.000 | 0.000 |
| 3340.709   | 0.000 | 0.000 | 0.000 | 3342.638 | 0.000 | 0.000 | 0.000 | 3344.567 | 0.000 | 0.000 | 0.000 |
| 3346.496   | 0.0   |       |       |          |       |       |       |          |       |       |       |



**Table S2** Pairwise t-test results of wave number markers

|    |          |       |       |       |          |       |       |       |          |       |       |       |
|----|----------|-------|-------|-------|----------|-------|-------|-------|----------|-------|-------|-------|
|    | 3477.655 | 0.000 | 0.000 | 0.000 | 3479.584 | 0.000 | 0.000 | 0.000 | 3481.513 | 0.000 | 0.000 | 0.000 |
|    | 3483.442 | 0.000 | 0.000 | 0.000 | 3485.371 | 0.000 | 0.000 | 0.000 | 3487.299 | 0.000 | 0.000 | 0.000 |
|    | 3489.228 | 0.000 | 0.000 | 0.000 | 3491.157 | 0.000 | 0.000 | 0.000 | 3493.086 | 0.000 | 0.000 | 0.000 |
|    | 3495.015 | 0.000 | 0.000 | 0.000 | 3496.943 | 0.000 | 0.000 | 0.000 | 3498.872 | 0.000 | 0.000 | 0.000 |
|    | 3500.801 | 0.000 | 0.000 | 0.000 | 3502.730 | 0.000 | 0.000 | 0.000 | 3504.659 | 0.000 | 0.000 | 0.000 |
|    | 3506.587 | 0.000 | 0.000 | 0.000 | 3508.516 | 0.000 | 0.000 | 0.000 | 3510.445 | 0.000 | 0.000 | 0.000 |
|    | 3512.374 | 0.000 | 0.000 | 0.000 | 3514.303 | 0.000 | 0.000 | 0.000 | 3516.232 | 0.000 | 0.000 | 0.000 |
|    | 3518.160 | 0.000 | 0.000 | 0.000 |          |       |       |       |          |       |       |       |
|    | 3197.977 | 0.000 | 0.000 | 0.000 | 3199.906 | 0.000 | 0.000 | 0.000 | 3201.835 | 0.000 | 0.000 | 0.000 |
|    | 3203.763 | 0.000 | 0.000 | 0.000 | 3205.692 | 0.000 | 0.000 | 0.000 | 3207.621 | 0.000 | 0.000 | 0.000 |
|    | 3209.550 | 0.000 | 0.000 | 0.000 | 3211.479 | 0.000 | 0.000 | 0.000 | 3213.407 | 0.000 | 0.000 | 0.000 |
|    | 3215.336 | 0.000 | 0.000 | 0.000 | 3217.265 | 0.000 | 0.000 | 0.000 | 3219.194 | 0.000 | 0.000 | 0.000 |
|    | 3221.123 | 0.000 | 0.000 | 0.000 | 3223.052 | 0.000 | 0.000 | 0.000 | 3224.980 | 0.000 | 0.000 | 0.000 |
|    | 3226.909 | 0.000 | 0.000 | 0.000 | 3228.838 | 0.000 | 0.000 | 0.000 | 3230.767 | 0.000 | 0.000 | 0.000 |
|    | 3232.696 | 0.000 | 0.000 | 0.000 | 3234.624 | 0.000 | 0.000 | 0.000 | 3236.553 | 0.000 | 0.000 | 0.000 |
|    | 3238.482 | 0.000 | 0.000 | 0.000 | 3240.411 | 0.000 | 0.000 | 0.000 | 3242.340 | 0.000 | 0.000 | 0.000 |
|    | 3244.269 | 0.000 | 0.000 | 0.000 | 3246.197 | 0.000 | 0.000 | 0.000 | 3248.126 | 0.000 | 0.000 | 0.000 |
|    | 3250.055 | 0.000 | 0.000 | 0.000 | 3251.984 | 0.000 | 0.000 | 0.000 | 3253.913 | 0.000 | 0.000 | 0.000 |
|    | 3255.841 | 0.000 | 0.000 | 0.000 | 3257.770 | 0.000 | 0.000 | 0.000 | 3259.699 | 0.000 | 0.000 | 0.000 |
|    | 3261.628 | 0.000 | 0.000 | 0.000 | 3263.557 | 0.000 | 0.000 | 0.000 | 3265.485 | 0.000 | 0.000 | 0.000 |
|    | 3267.414 | 0.000 | 0.000 | 0.000 | 3269.343 | 0.000 | 0.000 | 0.000 | 3271.272 | 0.000 | 0.000 | 0.000 |
|    | 3273.201 | 0.000 | 0.000 | 0.000 | 3275.130 | 0.000 | 0.000 | 0.000 | 3277.058 | 0.000 | 0.000 | 0.000 |
|    | 3278.987 | 0.000 | 0.000 | 0.000 | 3280.916 | 0.000 | 0.000 | 0.000 | 3282.845 | 0.000 | 0.000 | 0.000 |
|    | 3284.774 | 0.000 | 0.000 | 0.000 | 3286.702 | 0.000 | 0.000 | 0.000 | 3288.631 | 0.000 | 0.000 | 0.000 |
|    | 3290.560 | 0.000 | 0.000 | 0.000 | 3292.489 | 0.000 | 0.000 | 0.000 | 3294.418 | 0.000 | 0.000 | 0.000 |
|    | 3296.347 | 0.000 | 0.000 | 0.000 | 3298.275 | 0.000 | 0.000 | 0.000 | 3300.204 | 0.000 | 0.000 | 0.000 |
|    | 3302.133 | 0.000 | 0.000 | 0.000 | 3304.062 | 0.000 | 0.000 | 0.000 | 3305.991 | 0.000 | 0.000 | 0.000 |
|    | 3307.919 | 0.000 | 0.000 | 0.000 | 3309.848 | 0.000 | 0.000 | 0.000 | 3311.777 | 0.000 | 0.000 | 0.000 |
|    | 3313.706 | 0.000 | 0.000 | 0.000 | 3315.635 | 0.000 | 0.000 | 0.000 | 3317.564 | 0.000 | 0.000 | 0.000 |
|    | 3319.492 | 0.000 | 0.000 | 0.000 | 3321.421 | 0.000 | 0.000 | 0.000 | 3323.350 | 0.000 | 0.000 | 0.000 |
|    | 3325.279 | 0.000 | 0.000 | 0.000 | 3327.208 | 0.000 | 0.000 | 0.000 | 3329.136 | 0.000 | 0.000 | 0.000 |
|    | 3331.065 | 0.000 | 0.000 | 0.000 | 3332.994 | 0.000 | 0.000 | 0.000 | 3334.923 | 0.000 | 0.000 | 0.000 |
|    | 3336.852 | 0.000 | 0.000 | 0.000 | 3338.780 | 0.000 | 0.000 | 0.000 | 3340.709 | 0.000 | 0.000 | 0.000 |
|    | 3342.638 | 0.000 | 0.000 | 0.000 | 3344.567 | 0.000 | 0.000 | 0.000 | 3346.496 | 0.000 | 0.000 | 0.000 |
|    | 3348.425 | 0.000 | 0.000 | 0.000 | 3350.353 | 0.000 | 0.000 | 0.000 | 3352.282 | 0.000 | 0.000 | 0.000 |
|    | 3354.211 | 0.000 | 0.000 | 0.000 | 3356.140 | 0.000 | 0.000 | 0.000 | 3358.069 | 0.000 | 0.000 | 0.000 |
|    | 3359.997 | 0.000 | 0.000 | 0.000 | 3361.926 | 0.000 | 0.000 | 0.000 | 3363.855 | 0.000 | 0.000 | 0.000 |
|    | 3365.784 | 0.000 | 0.000 | 0.000 | 3367.713 | 0.000 | 0.000 | 0.000 | 3369.642 | 0.000 | 0.000 | 0.000 |
|    | 3371.570 | 0.000 | 0.000 | 0.000 | 3373.499 | 0.000 | 0.000 | 0.000 | 3375.428 | 0.000 | 0.000 | 0.000 |
| 12 | 3377.357 | 0.000 | 0.000 | 0.000 | 3379.286 | 0.000 | 0.000 | 0.000 | 3381.214 | 0.000 | 0.000 | 0.000 |
|    | 3383.143 | 0.000 | 0.000 | 0.000 | 3385.072 | 0.000 | 0.000 | 0.000 | 3387.001 | 0.000 | 0.000 | 0.000 |
|    | 3388.930 | 0.000 | 0.000 | 0.000 | 3390.859 | 0.000 | 0.000 | 0.000 | 3392.787 | 0.000 | 0.000 | 0.000 |
|    | 3394.716 | 0.000 | 0.000 | 0.000 | 3396.645 | 0.000 | 0.000 | 0.000 | 3398.574 | 0.000 | 0.000 | 0.000 |
|    | 3400.503 | 0.000 | 0.000 | 0.000 | 3402.431 | 0.000 | 0.000 | 0.000 | 3404.360 | 0.000 | 0.000 | 0.000 |
|    | 3406.289 | 0.000 | 0.000 | 0.000 | 3408.218 | 0.000 | 0.000 | 0.000 | 3410.147 | 0.000 | 0.000 | 0.000 |
|    | 3412.076 | 0.000 | 0.000 | 0.000 | 3414.004 | 0.000 | 0.000 | 0.000 | 3415.933 | 0.000 | 0.000 | 0.000 |
|    | 3417.862 | 0.000 | 0.000 | 0.000 | 3419.791 | 0.000 | 0.000 | 0.000 | 3421.720 | 0.000 | 0.000 | 0.000 |
|    | 3423.648 | 0.000 | 0.000 | 0.000 | 3425.577 | 0.000 | 0.000 | 0.000 | 3427.506 | 0.000 | 0.000 | 0.000 |
|    | 3429.435 | 0.000 | 0.000 | 0.000 | 3431.364 | 0.000 | 0.000 | 0.000 | 3433.292 | 0.000 | 0.000 | 0.000 |
|    | 3435.221 | 0.000 | 0.000 | 0.000 | 3437.150 | 0.000 | 0.000 | 0.000 | 3439.079 | 0.000 | 0.000 | 0.000 |
|    | 3441.008 | 0.000 | 0.000 | 0.000 | 3442.937 | 0.000 | 0.000 | 0.000 | 3444.865 | 0.000 | 0.000 | 0.000 |
|    | 3446.794 | 0.000 | 0.000 | 0.000 | 3448.723 | 0.000 | 0.000 | 0.000 | 3450.652 | 0.000 | 0.000 | 0.000 |
|    | 3452.581 | 0.000 | 0.000 | 0.000 | 3454.509 | 0.000 | 0.000 | 0.000 | 3456.438 | 0.000 | 0.000 | 0.000 |
|    | 3458.367 | 0.000 | 0.000 | 0.000 | 3460.296 | 0.000 | 0.000 | 0.000 | 3462.225 | 0.000 | 0.000 | 0.000 |
|    | 3464.154 | 0.000 | 0.000 | 0.000 | 3466.082 | 0.000 | 0.000 | 0.000 | 3468.011 | 0.000 | 0.000 | 0.000 |
|    | 3469.940 | 0.000 | 0.000 | 0.000 | 3471.869 | 0.000 | 0.000 | 0.000 | 3473.798 | 0.000 | 0.000 | 0.000 |
|    | 3475.726 | 0.000 | 0.000 | 0.000 | 3477.655 | 0.000 | 0.000 | 0.000 | 3479.584 | 0.000 | 0.000 | 0.000 |
|    | 3481.513 | 0.000 | 0.000 | 0.000 | 3483.442 | 0.000 | 0.000 | 0.000 | 3485.371 | 0.000 | 0.000 | 0.000 |
|    | 3487.299 | 0.000 | 0.000 | 0.000 | 3489.228 | 0.000 | 0.000 | 0.000 | 3491.157 | 0.000 | 0.000 | 0.000 |
|    | 3493.086 | 0.000 | 0.000 | 0.000 | 3495.015 | 0.000 | 0.000 | 0.000 | 3496.943 | 0.000 | 0.000 | 0.000 |
|    | 3498.872 | 0.000 | 0.000 | 0.000 | 3500.801 | 0.000 | 0.000 | 0.000 | 3502.730 | 0.000 | 0.000 | 0.000 |
|    | 3504.659 | 0.000 | 0.000 | 0.000 | 3506.587 | 0.000 | 0.000 | 0.000 | 3508.516 | 0.000 | 0.000 | 0.000 |
|    | 3510.445 | 0.000 | 0.000 | 0.000 | 3512.374 | 0.000 | 0.000 | 0.000 | 3514.303 | 0.000 | 0.000 | 0.000 |
|    | 3516.232 | 0.000 | 0.000 | 0.000 | 3518.160 | 0.000 | 0.000 | 0.000 | 3520.089 | 0.000 | 0.000 | 0.000 |
|    | 3522.018 | 0.000 | 0.000 | 0.000 | 3523.947 | 0.000 | 0.000 | 0.000 | 3525.876 | 0.000 | 0.000 | 0.000 |
|    | 3527.804 | 0.000 | 0.000 | 0.000 | 3529.733 | 0.000 | 0.000 | 0.000 | 3531.662 | 0.000 | 0.000 | 0.000 |
|    | 3533.591 | 0.000 | 0.000 | 0.000 | 3535.520 | 0.000 | 0.000 | 0.000 | 3537.449 | 0.000 | 0.000 | 0.000 |
|    | 3539.377 | 0.000 | 0.000 | 0.000 | 3541.306 | 0.000 | 0.000 | 0.000 | 3543.235 | 0.000 | 0.000 | 0.000 |
|    | 3545.164 | 0.000 | 0.000 | 0.000 | 3547.093 | 0.000 | 0.000 | 0.000 | 3549.021 | 0.000 | 0.000 | 0.000 |
|    | 3550.950 | 0.000 | 0.000 | 0.000 | 3552.879 | 0.000 | 0.000 | 0.000 | 3554.808 | 0.000 | 0.000 | 0.000 |
|    | 3556.737 | 0.000 | 0.000 | 0.000 | 3558.666 | 0.000 | 0.000 | 0.000 | 3560.594 | 0.000 | 0.000 | 0.000 |
|    | 3163.258 | 0.000 | 0.000 | 0.000 | 3165.187 | 0.000 | 0.000 | 0.000 | 3167.116 | 0.000 | 0.000 | 0.000 |
|    | 3169.045 | 0.000 | 0.000 | 0.000 | 3170.974 | 0.000 | 0.000 | 0.000 | 3172.902 | 0.000 | 0.000 | 0.000 |
|    | 3174.831 | 0.000 | 0.000 | 0.000 | 3176.760 | 0.000 | 0.000 | 0.000 | 3178.689 | 0.000 | 0.000 | 0.000 |
|    | 3180.618 | 0.000 | 0.000 | 0.000 | 3182.546 | 0.000 | 0.000 | 0.000 | 3184.475 | 0.000 | 0.000 | 0.000 |
|    | 3186.404 | 0.000 | 0.000 | 0.000 | 3188.333 | 0.000 | 0.000 | 0.000 | 3190.262 | 0.000 | 0.000 | 0.000 |
|    | 3192.190 | 0.000 | 0.000 | 0.000 | 3194.119 | 0.000 | 0.000 | 0.000 | 3196.048 | 0.000 | 0.000 | 0.000 |
|    | 3197.977 | 0.000 | 0.000 | 0.000 | 3199.906 | 0.000 | 0.000 | 0.000 | 3201.835 | 0.000 | 0.000 | 0.000 |
|    | 3203.763 | 0.000 | 0.000 | 0.000 | 3205.692 | 0.000 | 0.000 | 0.000 | 3207.621 | 0.000 | 0.000 | 0.000 |
|    | 3209.550 | 0.000 | 0.000 | 0.000 | 3211.479 | 0.000 | 0.000 | 0.000 | 3213.407 | 0.000 | 0.000 | 0.000 |
| 13 | 3215.336 | 0.000 | 0.000 | 0.000 | 3217.265 | 0.000 | 0.000 | 0.000 | 3219.194 | 0.000 | 0.000 | 0.000 |
|    | 3221.123 | 0.000 | 0.000 | 0.000 | 3223.052 | 0.000 | 0.000 | 0.000 | 3224.980 | 0.000 | 0.000 | 0.000 |
|    | 3226.909 | 0.000 | 0.000 | 0.000 | 3228.838 | 0.000 | 0.000 | 0.000 | 3230.767 | 0.000 | 0.000 | 0.000 |
|    | 3232.696 | 0.000 | 0.000 | 0.000 | 3234.624 | 0.000 | 0.000 | 0.000 | 3236.553 | 0.000 | 0.000 | 0.000 |
|    | 3238.482 | 0.000 | 0.000 | 0.000 | 3240.411 | 0.000 | 0.000 | 0.000 | 3242.340 | 0.000 | 0.000 | 0.000 |
|    | 3244.269 | 0.000 | 0.000 | 0.000 | 3246.197 | 0.000 | 0.000 | 0.000 | 3248.126 | 0.000 | 0.000 | 0.000 |
|    | 3250.055 | 0.000 | 0.000 | 0.000 | 3251.984 | 0.000 | 0.000 | 0.000 | 3253.913 | 0.000 | 0.000 | 0.000 |
|    | 3255.841 | 0.000 | 0.000 | 0.000 | 3257.770 | 0.000 | 0.000 | 0.000 | 3259.699 | 0.000 | 0.000 | 0.000 |
|    | 3261.628 | 0.000 | 0.000 | 0.000 | 3263.557 | 0.000 | 0.000 | 0.000 | 3265.485 | 0.000 | 0.000 | 0.000 |
|    | 3267.414 | 0.000 | 0.000 | 0.000 |          |       |       |       |          |       |       |       |

**Table S2** Pairwise t-test results of wave number markers

|          |       |       |       |          |       |       |       |          |       |       |       |
|----------|-------|-------|-------|----------|-------|-------|-------|----------|-------|-------|-------|
| 3350.353 | 0.000 | 0.000 | 0.000 | 3352.282 | 0.000 | 0.000 | 0.000 | 3354.211 | 0.000 | 0.000 | 0.000 |
| 3356.140 | 0.000 | 0.000 | 0.000 | 3358.069 | 0.000 | 0.000 | 0.000 | 3359.997 | 0.000 | 0.000 | 0.000 |
| 3361.926 | 0.000 | 0.000 | 0.000 | 3363.855 | 0.000 | 0.000 | 0.000 | 3365.784 | 0.000 | 0.000 | 0.000 |
| 3367.713 | 0.000 | 0.000 | 0.000 | 3369.642 | 0.000 | 0.000 | 0.000 | 3371.570 | 0.000 | 0.000 | 0.000 |
| 3373.499 | 0.000 | 0.000 | 0.000 | 3375.428 | 0.000 | 0.000 | 0.000 | 3377.357 | 0.000 | 0.000 | 0.000 |
| 3379.286 | 0.000 | 0.000 | 0.000 | 3381.214 | 0.000 | 0.000 | 0.000 | 3383.143 | 0.000 | 0.000 | 0.000 |
| 3385.072 | 0.000 | 0.000 | 0.000 | 3387.001 | 0.000 | 0.000 | 0.000 | 3388.930 | 0.000 | 0.000 | 0.000 |
| 3390.859 | 0.000 | 0.000 | 0.000 | 3392.787 | 0.000 | 0.000 | 0.000 | 3394.716 | 0.000 | 0.000 | 0.000 |
| 3396.645 | 0.000 | 0.000 | 0.000 | 3398.574 | 0.000 | 0.000 | 0.000 | 3400.503 | 0.000 | 0.000 | 0.000 |
| 3402.431 | 0.000 | 0.000 | 0.000 | 3404.360 | 0.000 | 0.000 | 0.000 | 3406.289 | 0.000 | 0.000 | 0.000 |
| 3408.218 | 0.000 | 0.000 | 0.000 | 3410.147 | 0.000 | 0.000 | 0.000 | 3412.076 | 0.000 | 0.000 | 0.000 |
| 3414.004 | 0.000 | 0.000 | 0.000 | 3415.933 | 0.000 | 0.000 | 0.000 | 3417.862 | 0.000 | 0.000 | 0.000 |
| 3419.791 | 0.000 | 0.000 | 0.000 | 3421.720 | 0.000 | 0.000 | 0.000 | 3423.648 | 0.000 | 0.000 | 0.000 |
| 3425.577 | 0.000 | 0.000 | 0.000 | 3427.506 | 0.000 | 0.000 | 0.000 | 3429.435 | 0.000 | 0.000 | 0.000 |
| 3431.364 | 0.000 | 0.000 | 0.000 | 3433.292 | 0.000 | 0.000 | 0.000 | 3435.221 | 0.000 | 0.000 | 0.000 |
| 3437.150 | 0.000 | 0.000 | 0.000 | 3439.079 | 0.000 | 0.000 | 0.000 | 3441.008 | 0.000 | 0.000 | 0.000 |
| 3442.937 | 0.000 | 0.000 | 0.000 | 3444.865 | 0.000 | 0.000 | 0.000 | 3446.794 | 0.000 | 0.000 | 0.000 |
| 3448.723 | 0.000 | 0.000 | 0.000 | 3450.652 | 0.000 | 0.000 | 0.000 | 3452.581 | 0.000 | 0.000 | 0.000 |
| 3454.509 | 0.000 | 0.000 | 0.000 | 3456.438 | 0.000 | 0.000 | 0.000 | 3458.367 | 0.000 | 0.000 | 0.000 |
| 3460.296 | 0.000 | 0.000 | 0.000 | 3462.225 | 0.000 | 0.000 | 0.000 | 3464.154 | 0.000 | 0.000 | 0.000 |
| 3466.082 | 0.000 | 0.000 | 0.000 | 3468.011 | 0.000 | 0.000 | 0.000 | 3469.940 | 0.000 | 0.000 | 0.000 |
| 3471.869 | 0.000 | 0.000 | 0.000 | 3473.798 | 0.000 | 0.000 | 0.000 | 3475.726 | 0.000 | 0.000 | 0.000 |
| 3477.655 | 0.000 | 0.000 | 0.000 |          |       |       |       |          |       |       |       |
| 1170.791 | 0.000 | 0.000 | 0.000 | 1172.720 | 0.000 | 0.000 | 0.000 | 1174.649 | 0.000 | 0.000 | 0.000 |
| 1176.578 | 0.000 | 0.000 | 0.000 | 1178.507 | 0.000 | 0.000 | 0.000 | 1180.435 | 0.000 | 0.000 | 0.000 |
| 1182.364 | 0.000 | 0.000 | 0.000 | 1184.293 | 0.000 | 0.000 | 0.000 | 1186.222 | 0.000 | 0.000 | 0.000 |
| 1188.151 | 0.000 | 0.000 | 0.000 | 1190.079 | 0.000 | 0.000 | 0.000 | 1192.008 | 0.000 | 0.000 | 0.000 |
| 1193.937 | 0.000 | 0.000 | 0.000 | 1195.866 | 0.000 | 0.000 | 0.000 | 1197.795 | 0.000 | 0.000 | 0.000 |
| 1199.724 | 0.000 | 0.000 | 0.000 | 1201.652 | 0.000 | 0.000 | 0.000 | 1203.581 | 0.000 | 0.000 | 0.000 |
| 1205.510 | 0.000 | 0.000 | 0.000 | 1207.439 | 0.000 | 0.000 | 0.000 | 1209.368 | 0.000 | 0.000 | 0.000 |
| 1211.296 | 0.000 | 0.000 | 0.000 | 1213.225 | 0.000 | 0.000 | 0.000 | 1215.154 | 0.000 | 0.000 | 0.000 |
| 1217.083 | 0.000 | 0.000 | 0.000 | 1219.012 | 0.000 | 0.000 | 0.000 | 1220.941 | 0.000 | 0.000 | 0.000 |
| 1222.869 | 0.000 | 0.000 | 0.000 | 1224.798 | 0.000 | 0.000 | 0.000 | 1226.727 | 0.000 | 0.000 | 0.000 |
| 1228.656 | 0.000 | 0.000 | 0.000 | 1230.585 | 0.000 | 0.000 | 0.000 | 1232.513 | 0.000 | 0.000 | 0.000 |
| 1234.442 | 0.000 | 0.000 | 0.000 | 1236.371 | 0.000 | 0.000 | 0.000 | 1238.300 | 0.000 | 0.000 | 0.000 |
| 1240.229 | 0.000 | 0.000 | 0.000 | 1242.158 | 0.000 | 0.000 | 0.000 | 1244.086 | 0.000 | 0.000 | 0.000 |
| 1246.015 | 0.000 | 0.000 | 0.000 | 1247.944 | 0.000 | 0.000 | 0.000 | 1249.873 | 0.000 | 0.000 | 0.000 |
| 1251.802 | 0.000 | 0.000 | 0.000 | 1253.730 | 0.000 | 0.000 | 0.000 | 1255.659 | 0.000 | 0.000 | 0.000 |
| 1257.588 | 0.000 | 0.000 | 0.000 | 1259.517 | 0.000 | 0.000 | 0.000 | 1261.446 | 0.000 | 0.000 | 0.000 |
| 1263.374 | 0.000 | 0.000 | 0.000 | 1265.303 | 0.000 | 0.000 | 0.000 | 1267.232 | 0.000 | 0.000 | 0.000 |
| 1269.161 | 0.000 | 0.000 | 0.000 | 1271.090 | 0.000 | 0.000 | 0.000 | 1273.019 | 0.000 | 0.000 | 0.000 |
| 1274.947 | 0.000 | 0.000 | 0.000 | 1276.876 | 0.000 | 0.000 | 0.000 | 1278.805 | 0.000 | 0.000 | 0.000 |
| 1280.734 | 0.000 | 0.000 | 0.000 | 1282.663 | 0.000 | 0.000 | 0.000 | 1284.591 | 0.000 | 0.000 | 0.000 |
| 1286.520 | 0.000 | 0.000 | 0.000 | 1288.449 | 0.000 | 0.000 | 0.000 | 1290.378 | 0.000 | 0.000 | 0.000 |
| 1292.307 | 0.000 | 0.000 | 0.000 | 1294.236 | 0.000 | 0.000 | 0.000 | 1296.164 | 0.000 | 0.000 | 0.000 |
| 1298.093 | 0.000 | 0.000 | 0.000 | 1300.022 | 0.000 | 0.000 | 0.000 | 1301.951 | 0.000 | 0.000 | 0.000 |
| 1303.880 | 0.000 | 0.000 | 0.000 | 1305.808 | 0.000 | 0.000 | 0.000 | 1307.737 | 0.000 | 0.000 | 0.000 |
| 1309.666 | 0.000 | 0.000 | 0.000 | 1311.595 | 0.000 | 0.000 | 0.000 | 1313.524 | 0.000 | 0.000 | 0.000 |
| 1315.453 | 0.000 | 0.000 | 0.000 | 1317.381 | 0.000 | 0.000 | 0.000 | 1319.310 | 0.000 | 0.000 | 0.000 |
| 1321.239 | 0.000 | 0.000 | 0.000 | 1323.168 | 0.000 | 0.000 | 0.000 | 1325.097 | 0.000 | 0.000 | 0.000 |
| 1327.025 | 0.000 | 0.000 | 0.000 | 1328.954 | 0.000 | 0.000 | 0.000 | 1330.883 | 0.000 | 0.000 | 0.000 |
| 1332.812 | 0.000 | 0.000 | 0.000 | 1334.741 | 0.000 | 0.000 | 0.000 | 1336.669 | 0.000 | 0.000 | 0.000 |
| 1338.598 | 0.000 | 0.000 | 0.000 |          |       |       |       |          |       |       |       |

18

$P_{15}$ ,  $P_{16}$  and  $P_{17}$  represent significance level of the wave number markers between the specific rice group and No. 15, 16 and 17 groups, respectively.

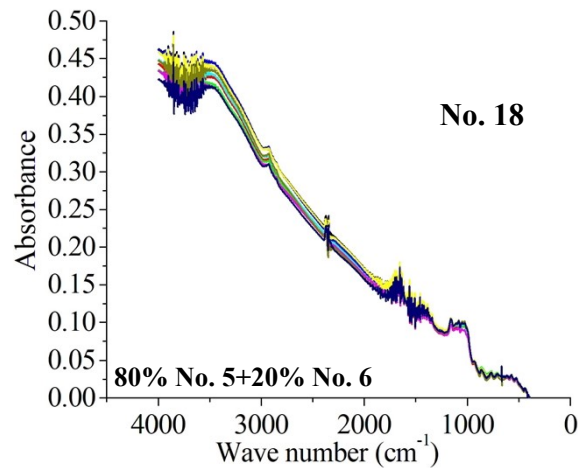**Fig. S1** Infrared spectrum of mixed rice group.

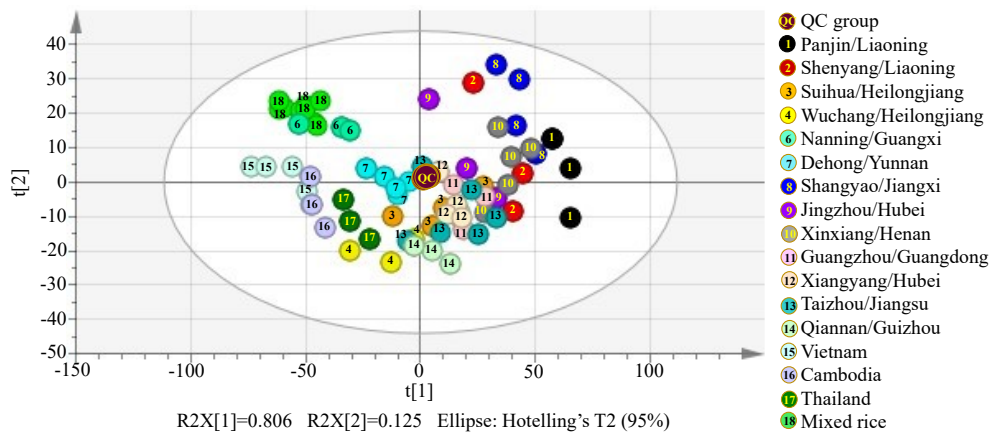

**Fig. S2** PCA score plot of 17 rice groups (No. 18 group to replace No. 5 group).





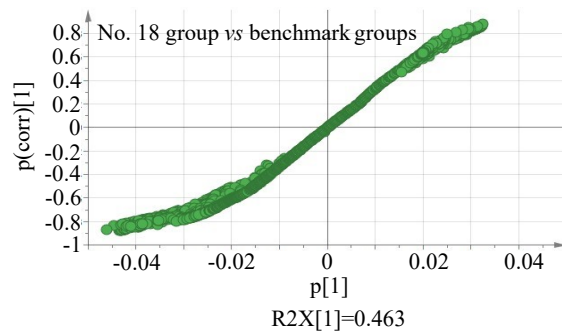

**Fig. S5** S-plot plot of No. 18 rice group.

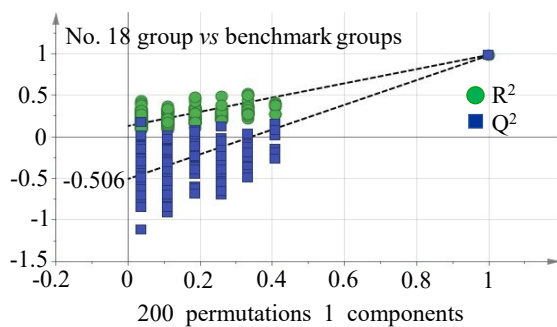

**Fig. S6** Permutation test plot of No. 18 rice group.
